# Supplementary material for: Noncentrosymmetric tellurite halides created by a depolymerization strategy: toward strong SHG intensity and wide bandgap
Source: Royal Society of Chemistry journal article supplement (doi:10.1039/d4sc06403h), 2024-01-01
Supplement: d4sc06403h1.pdf [file d4sc06403h1.pdf]

## **Noncentrosymmetric tellurite halides created by a depolymerization strategy: toward strong SHG intensity and wide bandgap**

Dan-Dan Zhou<sup>a,b,c</sup>, Chun-Li Hu<sup>a,b</sup>, Xin-Wei Zhang<sup>a,c</sup>, Jiang-Gao Mao<sup>a,b,c</sup>, Fang Kong<sup>a,b,c\*</sup>

---

- a State Key Laboratory of Structural Chemistry, Fujian Institute of Research on the Structure of Matter, Chinese Academy of Sciences, Fuzhou 350002, P. R. China  
E-mail: kongfang@fjirsm.ac.cn
- b University of Chinese Academy of Sciences, Beijing 100049, P. R. China
- c Fujian College, University of Chinese Academy of Sciences, Fuzhou 350002, P. R. China

# Supporting Information

## Table of Contents

| Section           | Caption                                                                                                                                                                                                                                                       | Page       |
|-------------------|---------------------------------------------------------------------------------------------------------------------------------------------------------------------------------------------------------------------------------------------------------------|------------|
| <b>S1</b>         | Experimental Section.                                                                                                                                                                                                                                         | <b>S3</b>  |
| <b>S2</b>         | Computational Methods.                                                                                                                                                                                                                                        | <b>S6</b>  |
| <b>Table S1</b>   | Reported metal tellurite NLO materials with band gaps above 3.70 eV.                                                                                                                                                                                          | <b>S8</b>  |
| <b>Table S2</b>   | Reported crystals of tellurite bromides or chlorides with NCS space groups, except for magnetic compounds.                                                                                                                                                    | <b>S8</b>  |
| <b>Table S3</b>   | Calculated bond valences for <b>1</b> , <b>2</b> , <b>3</b> , <b>4</b> , <b>5</b> , and <b>6</b> .                                                                                                                                                            | <b>S9</b>  |
| <b>Table S4</b>   | Calculated the distortion of GaO <sub>6</sub> and AlO <sub>6</sub> octahedra for <b>2</b> , <b>3</b> , and <b>4</b> and <b>5</b> , <b>6</b> .                                                                                                                 | <b>S13</b> |
| <b>Table S5</b>   | Calculated dipole moments for TeO <sub>3</sub> and GaO <sub>6</sub> (AlO <sub>6</sub> ), as well as net dipole moment for a unit cell in <b>2</b> , <b>3</b> , <b>4</b> , <b>5</b> , and <b>6</b> .                                                           | <b>S14</b> |
| <b>Table S6</b>   | State energies (eV) of the highest valence band (H-VB) and the lowest conduction band (L-CB) of <b>1</b> , <b>2</b> , <b>4</b> , and <b>6</b> .                                                                                                               | <b>S15</b> |
| <b>Figure S1</b>  | As-grown small crystals of <b>1</b> (a), <b>2</b> (b), <b>3</b> (c), <b>4</b> (d), and <b>6</b> (e).                                                                                                                                                          | <b>S17</b> |
| <b>Figure S2</b>  | Simulated and experimental XRD powder patterns of <b>1</b> (a), <b>2</b> (b), <b>3</b> (c), <b>4</b> (d), and <b>6</b> (e).                                                                                                                                   | <b>S17</b> |
| <b>Figure S3</b>  | SEM images of <b>1</b> (a), <b>2</b> (b), <b>3</b> (c), <b>4</b> (d), <b>5</b> (e) and <b>6</b> (f) and their elemental distribution maps.                                                                                                                    | <b>S20</b> |
| <b>Figure S4</b>  | Coordination environments of the Te and Ga atoms in <b>1</b> .                                                                                                                                                                                                | <b>S21</b> |
| <b>Figure S5</b>  | Coordination environments of the Te and Ga atoms in <b>2</b> .                                                                                                                                                                                                | <b>S21</b> |
| <b>Figure S6</b>  | The orientation of the dipole moment of [Te(1)O <sub>3</sub> ] <sup>2-</sup> (a), [Te(2)O <sub>3</sub> ] <sup>2-</sup> (b), and [Te(3)O <sub>3</sub> ] <sup>2-</sup> (c) trigonal pyramids in <b>2</b> , arrows indicate the direction of the dipole moments. | <b>S22</b> |
| <b>Figure S7</b>  | TG and DTA curves of <b>1</b> (a), <b>2</b> (b), <b>3</b> (c), <b>4</b> (d), and <b>6</b> (e) under N <sub>2</sub> atmosphere.                                                                                                                                | <b>S23</b> |
| <b>Figure S8</b>  | Infrared spectra of <b>1</b> (a), <b>2</b> (b), <b>3</b> (c), <b>4</b> (d), and <b>6</b> (e).                                                                                                                                                                 | <b>S25</b> |
| <b>Figure S9</b>  | UV-vis-NIR diffuse reflectance spectra of <b>1</b> (a), <b>2</b> (b), <b>3</b> (c), <b>4</b> (d), and <b>6</b> (e).                                                                                                                                           | <b>S28</b> |
| <b>Figure S10</b> | Semilogarithmic plot of the absorption spectrum (a1-e1). Band gap determination assuming direct (a2-e2) and indirect (a3-e3) transitions. Direct band gap fit for <b>1</b> , <b>2</b> , <b>3</b> , <b>4</b> , and <b>6</b> (a4-e4).                           | <b>S30</b> |
| <b>Figure S11</b> | The band structures of <b>1</b> (a), <b>2</b> (b), <b>4</b> (c), and <b>6</b> (d).                                                                                                                                                                            | <b>S33</b> |
| <b>Figure S12</b> | The experiment birefringence of <b>2</b> (a), <b>4</b> (b), and <b>6</b> (c).                                                                                                                                                                                 | <b>S35</b> |
| <b>References</b> |                                                                                                                                                                                                                                                               | <b>S36</b> |

## **S1. Experimental Section**

### **Materials and Instrumentations.**

**All the chemicals** were obtained from commercial sources and used without further purification: TeO<sub>2</sub> (Adamas-beta, 99.99%), BiBr<sub>3</sub> (LeYan, 98%), BiCl<sub>3</sub> (LeYan, 99%), Ga<sub>2</sub>O<sub>3</sub> (Aladdin, 99.9%), Al<sub>2</sub>O<sub>3</sub> (Aladdin, 99.9%), HBr (Adamas-beta, 40%) and HCl (Greagent, 36-38%).

**Powder X-ray diffraction (PXRD)** patterns for the five compounds were obtained using a Miniflex 600 powder X-ray diffractometer, employing Cu K $\alpha$  radiation with a wavelength of 1.54186 Å. The measurements were conducted at room temperature and encompassed an angular range of 2 $\theta$  between 10° and 70°, with a scan step size of 0.02°.

**Elemental analysis** were conducted using a field-emission scanning electron microscope (JSM6700F) equipped with an energy-dispersive X-ray spectroscope (Oxford INCA).

**Infrared (IR) spectra** were analyzed utilizing a Magna 750 FT-IR spectrometer, employing air as the background. The analysis was conducted within the range of 4000–400 cm<sup>-1</sup> and achieved a resolution of 2 cm<sup>-1</sup> at room temperature.

**The UV-vis-NIR spectra** were acquired within the 2000–200 nm range using a PerkinElmer Lambda 900 spectrophotometer, with BaSO<sub>4</sub> serving as the reference. The reflection spectra were subsequently transformed into absorption spectra through the application of the Kubelka-Munk function. Absorption data was derived from the diffuse reflection data utilizing the Kubelka-Munk function:  $\alpha/S = (1-R)^2/2R$ , where ' $\alpha$ ' and ' $S$ ' denote the absorption coefficient and scattering coefficient, respectively. The band gap value can be determined by extrapolating the absorption edge to the baseline in the  $\alpha/S$  versus energy graph.

**Thermogravimetric (TG) analyses** were executed utilizing a Netzsch STA 499C

apparatus. Samples, with an approximate weight of 5.0 to 10.0 mg, were encapsulated in alumina crucibles and subjected to a heating process ranging from 20 to 1200°C at a rate of 15°C/min under a nitrogen atmosphere.

**Powder SHG measurements** were conducted using a modified method of Kurtz and Perry. Irradiation laser ( $\lambda = 1064$  nm) was generated by a Nd:YAG solid-state laser equipped with a Q switch. Pure crystal samples of four compounds, ground into powder, were sieved across seven distinct particle size ranges: 45–53, 53–75, 75–105, 105–150, 150–210, and 210–300  $\mu\text{m}$ . For reference purposes,  $\text{KH}_2\text{PO}_4$  (KDP) samples within the same size range were also prepared. The SHG signals were meticulously recorded in the oscilloscope trace for four distinct compounds and KDP samples, specifically within the particle size range of 150–210  $\mu\text{m}$ .

**Laser-induced damage threshold (LIDT) measurements** were conducted on compounds **2**, **3**, **4**, and **6** using a Q-switched pulsed laser. The particle size of the test samples ranged from 150 to 210  $\mu\text{m}$ . The laser wavelength was set at 1064 nm, with a pulse width of 10 ns and a frequency of 1 Hz. The focused area of the laser spot on the sample was 2.01 mm<sup>2</sup>. As the measurement progressed, the energy emitted by the laser gradually increased. The laser damage threshold of the sample was determined when it turned black under the laser's exposure.

**Birefringence Measurements.** The birefringence ( $\Delta n$ ) of compounds **2**, **4**, **6** was measured using a ZEISS Axio Scope A1 polarizing microscope at  $\lambda = 546$  nm. Owing to the clear boundary lines of the first-, second- and third-order interference color, the relative error was small enough. Before the scanning, the small and transparent compounds **2**, **4**, **6** crystals were chosen to measure, in order to improve the accuracy of the birefringence. The thickness of the selected crystal was measured on the polarizing microscope. The formula for calculating the birefringence is listed below:

$R = |n_e - n_o| \times T = \Delta n \times T$ . Here, R represents the optical path difference,  $\Delta n$  means the

birefringence, and  $T$  denotes the thickness of the crystal.

**Single crystal X-ray diffraction** data were collected using an Agilent Technologies SuperNova dual-wavelength CCD diffractometer, employing graphite-monochromated Mo-K $\alpha$  radiation ( $\lambda = 0.71073 \text{ \AA}$ ) at ambient temperature. Data reduction and cell refinement were executed using CrysAlisPro. The structure was elucidated through direct methods and subsequently refined via full-matrix least-squares fitting on  $F^2$ , utilizing the *OLEX 2-1.5* and *SHELXL-97* crystallographic software package. All atoms underwent refinement with anisotropic thermal parameters. The structural data were further validated by PLATON, revealing no evidence of higher symmetry. Detailed crystallographic data for all compounds are presented in Table 1, while bond lengths are detailed in Table S3.

## Syntheses

The six compounds were synthesized via a mild hydrothermal reaction. The chemical ratios for each compound are as follows: For Ga(Te<sub>3</sub>O<sub>7</sub>)Br (**1**), the reactants included TeO<sub>2</sub> (303.2 mg, 1.9 mmol), Ga<sub>2</sub>O<sub>3</sub> (67.5 mg, 0.36 mmol), HBr (0.2 mL), and H<sub>2</sub>O (1 mL). For Ga<sub>2</sub>(OH)(TeO<sub>3</sub>)(Te<sub>2</sub>O<sub>5</sub>)Br (**2**), the reactants included TeO<sub>2</sub> (399.0 mg, 2.5 mmol), Ga<sub>2</sub>O<sub>3</sub> (243.7 mg, 1.3 mmol), BiBr<sub>3</sub> (157.0 mg, 0.35 mmol), HBr (0.2 mL), and H<sub>2</sub>O (1 mL). For Ga<sub>2</sub>(OH)(TeO<sub>3</sub>)(Te<sub>2</sub>O<sub>5</sub>)Br<sub>0.5</sub>Cl<sub>0.5</sub> (**3**), the reactants included TeO<sub>2</sub> (319.2 mg, 2 mmol), Ga<sub>2</sub>O<sub>3</sub> (187.4 mg, 1 mmol), BiBr<sub>3</sub> (179.5 mg, 0.5 mmol), HCl (0.2 mL), and H<sub>2</sub>O (1 mL). For Ga<sub>2</sub>(OH)(TeO<sub>3</sub>)(Te<sub>2</sub>O<sub>5</sub>)Cl (**4**), the reactants included TeO<sub>2</sub> (303.2 mg, 1.9 mmol), Ga<sub>2</sub>O<sub>3</sub> (243.7 mg, 1.3 mmol), BiCl<sub>3</sub> (157.7 mg, 0.5 mmol), HCl (0.2 mL), and H<sub>2</sub>O (1 mL). For Al<sub>2</sub>(OH)(TeO<sub>3</sub>)(Te<sub>2</sub>O<sub>5</sub>)Br (**5**), the reactants included TeO<sub>2</sub> (319.2 mg, 2 mmol), Al<sub>2</sub>O<sub>3</sub> (132.5 mg, 1.3 mmol), HBr (0.2 mL), and H<sub>2</sub>O (1 mL). For Al<sub>2</sub>(OH)(TeO<sub>3</sub>)(Te<sub>2</sub>O<sub>5</sub>)Cl (**6**), the reactants included TeO<sub>2</sub> (399.0 mg, 2.5 mmol), Al<sub>2</sub>O<sub>3</sub> (132.5 mg, 1.3 mmol), HCl (0.2 mL), and H<sub>2</sub>O (1 mL).

These mixtures were then sealed in a Teflon liner equipped with a volume of 23 mL and heated at 230°C for a duration of 4 days. Following this, they were cooled to room temperature at a rate of 3°C/h. The resulting products were isolated through vacuum filtration, washed with alcohol, and dried at ambient temperature. For compounds  $\text{Ga}(\text{Te}_3\text{O}_7)\text{Br}$  (1),  $\text{Ga}_2(\text{OH})(\text{TeO}_3)(\text{Te}_2\text{O}_5)\text{Br}$  (2),  $\text{Ga}_2(\text{OH})(\text{TeO}_3)(\text{Te}_2\text{O}_5)\text{Br}_{0.5}\text{Cl}_{0.5}$  (3),  $\text{Ga}_2(\text{OH})(\text{TeO}_3)(\text{Te}_2\text{O}_5)\text{Cl}$  (4), and  $\text{Al}_2(\text{OH})(\text{TeO}_3)(\text{Te}_2\text{O}_5)\text{Cl}$  (6), based on the Te element, the yields of transparent rod crystals were 30%, 44%, 60%, 53%, and 50%, respectively. The yield of  $\text{Al}_2(\text{OH})(\text{TeO}_3)(\text{Te}_2\text{O}_5)\text{Br}$  (5) was not calculated due to the absence of a pure phase. The purity of these crystals was subsequently confirmed through Powder X-ray diffraction (PXRD) studies.

## S2. Computational Methods

**The theoretical calculations** utilized the single-crystal structural data of  $\text{Ga}(\text{Te}_3\text{O}_7)\text{Br}$  (1),  $\text{Ga}_2(\text{OH})(\text{TeO}_3)(\text{Te}_2\text{O}_5)\text{Br}$  (2),  $\text{Ga}_2(\text{OH})(\text{TeO}_3)(\text{Te}_2\text{O}_5)\text{Cl}$  (4), and  $\text{Al}_2(\text{OH})(\text{TeO}_3)(\text{Te}_2\text{O}_5)\text{Cl}$  (6). The electronic structures and optical properties were computed using a plane-wave pseudopotentials method within density functional theory (DFT), as implemented in the total energy code of CASTEP.<sup>1</sup> For the exchange-correlation functional, we selected Perdew–Burke–Ernzerhof (PBE) in the generalized gradient approximation (GGA).<sup>2</sup> Interactions between the ionic cores and electrons were characterized by the norm-conserving pseudopotential.<sup>3</sup> The following valence-electron configurations were considered: Ga-3d<sup>10</sup>4s<sup>2</sup>4p<sup>1</sup>, Al-3s<sup>2</sup>3p<sup>1</sup>, O-2s<sup>2</sup>2p<sup>4</sup>, Te-5s<sup>2</sup>5p<sup>4</sup>, Cl-3s<sup>2</sup>3p<sup>5</sup>, Br-4s<sup>2</sup>4p<sup>5</sup>, and H-1s<sup>1</sup>. The number of plane waves incorporated into the basis sets was determined by a cutoff energy of 750 eV. For the numerical integration of the Brillouin zone for these four compounds, we employed the Monkhorst-Pack k-point sampling method, each with a grid size of 2 × 3 × 2 for  $\text{Ga}(\text{Te}_3\text{O}_7)\text{Br}$  (1), 2 × 4 × 3 for  $\text{Ga}_2(\text{OH})(\text{TeO}_3)(\text{Te}_2\text{O}_5)\text{Br}$  (2),  $\text{Ga}_2(\text{OH})(\text{TeO}_3)(\text{Te}_2\text{O}_5)\text{Cl}$  (4), and  $\text{Al}_2(\text{OH})(\text{TeO}_3)(\text{Te}_2\text{O}_5)\text{Cl}$  (6).

The computation of second-order NLO properties was conducted utilizing the length-gauge formalism within the framework of the independent particle approximation.<sup>4</sup> We employed Chen's static formula, originally derived by Rashkeev et al.<sup>5</sup> and subsequently refined by Chen's team. The NLO susceptibility can be articulated as  $\chi^{\alpha\beta\gamma} = \chi^{\alpha\beta\gamma}(\text{VE}) + \chi^{\alpha\beta\gamma}(\text{VH}) + \chi^{\alpha\beta\gamma}(\text{two bands})$ , where  $\chi^{\alpha\beta\gamma}(\text{VE})$  and  $\chi^{\alpha\beta\gamma}(\text{VH})$  contribute to  $\chi^{\alpha\beta\gamma}$  from virtual-electron processes and virtual-hole processes, respectively, and  $\chi^{\alpha\beta\gamma}(\text{two bands})$  contributes to  $\chi^{\alpha\beta\gamma}$  from the two-band processes. The formulae for calculating  $\chi^{\alpha\beta\gamma}(\text{VE})$ , and  $\chi^{\alpha\beta\gamma}(\text{VH})$ , are given in ref<sup>6</sup>.

**Table S1.** Reported metal tellurite NLO materials with band gaps above 3.70 eV.

| Space group                                     | Compounds                                                                                                                         | SHG efficiency          | E <sub>g</sub> (eV) |
|-------------------------------------------------|-----------------------------------------------------------------------------------------------------------------------------------|-------------------------|---------------------|
| <i>P2<sub>1</sub>2<sub>1</sub>2</i>             | K <sub>2</sub> TeP <sub>2</sub> O <sub>8</sub> <sup>7</sup>                                                                       | < 0.1 × KDP             | 4.6                 |
| <i>P2<sub>1</sub></i>                           | K <sub>2</sub> (TeO)P <sub>2</sub> O <sub>7</sub> <sup>8</sup>                                                                    | 0.1 × KDP               | 4.16                |
| <i>P2<sub>1</sub>2<sub>1</sub>2</i>             | Rb <sub>2</sub> TeOP <sub>2</sub> O <sub>7</sub> <sup>9</sup>                                                                     | 0.1 × KDP               | 4.36                |
| <i>P2<sub>1</sub>2<sub>1</sub>2<sub>1</sub></i> | In <sub>3</sub> (SO <sub>4</sub> )(TeO <sub>3</sub> ) <sub>2</sub> F <sub>3</sub> (H <sub>2</sub> O) <sup>10</sup>                | 0.11 × KDP              | 4.1                 |
| <i>P6<sub>3</sub>mc</i>                         | Bi <sub>3</sub> F(TeO <sub>3</sub> )(TeO <sub>2</sub> F <sub>2</sub> ) <sub>3</sub> <sup>11</sup>                                 | 9 × α-SiO <sub>2</sub>  | 3.85                |
| <i>Cc</i>                                       | RbK <sub>3</sub> Te <sub>8</sub> O <sub>18</sub> •5H <sub>2</sub> O <sup>12</sup>                                                 | 0.2 × KDP               | 3.82                |
| <i>P2<sub>1</sub>2<sub>1</sub>2<sub>1</sub></i> | Bi <sub>2</sub> Te <sub>2</sub> O <sub>6</sub> (NO <sub>3</sub> ) <sub>2</sub> (OH) <sub>2</sub> (H <sub>2</sub> O) <sup>13</sup> | 20 × α-SiO <sub>2</sub> | 4                   |
| <i>P2<sub>1</sub></i>                           | Cd <sub>3</sub> (MoO <sub>4</sub> )(TeO <sub>3</sub> ) <sub>2</sub> <sup>14</sup>                                                 | 1.0 × KDP               | 3.81                |
| <i>I-4<sub>3</sub>d</i>                         | α-Ga <sub>2</sub> (TeO <sub>3</sub> ) <sub>3</sub> <sup>15</sup>                                                                  | 1.0 × KDP               | 4.14                |
| <i>Aba2</i>                                     | CdPb <sub>2</sub> Te <sub>3</sub> O <sub>8</sub> Cl <sub>2</sub> <sup>16</sup>                                                    | 1.1 × KDP               | 3.89                |
| <i>P2<sub>1</sub></i>                           | Zn <sub>2</sub> (MoO <sub>4</sub> )(TeO <sub>3</sub> ) <sup>17</sup>                                                              | 80 × α-SiO <sub>2</sub> | 4.1                 |
| <i>P2<sub>1</sub></i>                           | Ca <sub>3</sub> (TeO <sub>3</sub> ) <sub>2</sub> (WO <sub>4</sub> ) <sup>18</sup>                                                 | 2.8 × KDP               | 4.27                |
| <i>P6<sub>3</sub></i>                           | Li <sub>7</sub> (TeO <sub>3</sub> ) <sub>3</sub> F <sup>19</sup>                                                                  | 3 × KDP                 | 4.75                |
| <i>Pmn2<sub>1</sub></i>                         | BaF <sub>2</sub> TeF <sub>2</sub> (OH) <sub>2</sub> <sup>20</sup>                                                                 | 3 × KDP                 | 5.9                 |
| <i>P2<sub>1</sub></i>                           | Ca <sub>3</sub> (TeO <sub>3</sub> ) <sub>2</sub> (MoO <sub>4</sub> ) <sup>18</sup>                                                | 3.5 × KDP               | 4.44                |
| <b><i>Pca2<sub>1</sub></i></b>                  | <b>Al<sub>2</sub>(OH)(TeO<sub>3</sub>)(Te<sub>2</sub>O<sub>5</sub>)Cl*</b>                                                        | <b>4.0 × KDP</b>        | <b>4.35</b>         |
| <b><i>Pca2<sub>1</sub></i></b>                  | <b>Ga<sub>2</sub>(OH)(TeO<sub>3</sub>)(Te<sub>2</sub>O<sub>5</sub>)Cl*</b>                                                        | <b>5.9 × KDP</b>        | <b>4.25</b>         |
| <b><i>Pca2<sub>1</sub></i></b>                  | <b>Ga<sub>2</sub>(OH)(TeO<sub>3</sub>)(Te<sub>2</sub>O<sub>5</sub>)Br<sub>0.5</sub>Cl<sub>0.5</sub>*</b>                          | <b>7.9 × KDP</b>        | <b>4.03</b>         |
| <b><i>Pca2<sub>1</sub></i></b>                  | <b>Ga<sub>2</sub>(OH)(TeO<sub>3</sub>)(Te<sub>2</sub>O<sub>5</sub>)Br*</b>                                                        | <b>9.8 × KDP</b>        | <b>3.89</b>         |
| <i>P2<sub>1</sub></i>                           | LiNbTeO <sub>5</sub> <sup>21</sup>                                                                                                | 17 × KDP                | 3.75                |
| <i>Pca2<sub>1</sub></i>                         | Cd <sub>2</sub> Nb <sub>2</sub> Te <sub>4</sub> O <sub>15</sub> <sup>22</sup>                                                     | 31 × KDP                | 3.75                |
| <b>*This work</b>                               |                                                                                                                                   |                         |                     |

**Table S2.** Reported crystals of tellurite bromides or chlorides with NCS space groups, except for magnetic compounds.

| Space group                    | Compounds                                                                      | SHG efficiency   | E <sub>g</sub> (eV) |
|--------------------------------|--------------------------------------------------------------------------------|------------------|---------------------|
| <i>Aba2</i>                    | Ba <sub>6</sub> Te <sub>10</sub> O <sub>25</sub> Br <sub>2</sub> <sup>23</sup> | /                | /                   |
| <i>Pmm2</i>                    | Bi <sub>4</sub> Te <sub>2</sub> O <sub>9</sub> Br <sub>2</sub> <sup>24</sup>   | /                | /                   |
| <i>Pca2<sub>1</sub></i>        | CdCl <sub>8</sub> (Te <sub>7</sub> O <sub>17</sub> ) <sup>25</sup>             | /                | /                   |
| <i>Pna2<sub>1</sub></i>        | Pb <sub>3</sub> (TeO <sub>3</sub> )Cl <sub>4</sub> <sup>26</sup>               | /                | 3.79                |
| <i>Pna2<sub>1</sub></i>        | Pb <sub>3</sub> (TeO <sub>3</sub> )Br <sub>4</sub> <sup>27</sup>               | 1 × KDP          | 3.31                |
| <i>Aba2</i>                    | CdPb <sub>2</sub> Te <sub>3</sub> O <sub>8</sub> Cl <sub>2</sub> <sup>16</sup> | 1.1 × KDP        | 3.89                |
| <b><i>Pca2<sub>1</sub></i></b> | <b>Al<sub>2</sub>(OH)(TeO<sub>3</sub>)(Te<sub>2</sub>O<sub>5</sub>)Cl*</b>     | <b>4.0 × KDP</b> | <b>4.35</b>         |



|                          |                                                                                                               |           |      |
|--------------------------|---------------------------------------------------------------------------------------------------------------|-----------|------|
| <i>Pca2</i> <sub>1</sub> | Ga <sub>2</sub> (OH)(TeO <sub>3</sub> )(Te <sub>2</sub> O <sub>5</sub> )Cl*                                   | 5.9 × KDP | 4.25 |
| <i>Pca2</i> <sub>1</sub> | Ga <sub>2</sub> (OH)(TeO <sub>3</sub> )(Te <sub>2</sub> O <sub>5</sub> )Br <sub>0.5</sub> Cl <sub>0.5</sub> * | 7.9 × KDP | 4.03 |
| <i>Pca2</i> <sub>1</sub> | Ga <sub>2</sub> (OH)(TeO <sub>3</sub> )(Te <sub>2</sub> O <sub>5</sub> )Br*                                   | 9.8 × KDP | 3.89 |
| *This work               |                                                                                                               |           |      |

**Table S3.** Calculated bond valences for **1**, **2**, **3**, **4**, **5**, and **6**.

| Compound                                                                                | Bond     | Bond lengths | Bond-valence | BVS   |
|-----------------------------------------------------------------------------------------|----------|--------------|--------------|-------|
| Ga(Te <sub>3</sub> O <sub>7</sub> )Br ( <b>1</b> )                                      | Te1-O2   | 1.890(5)     | 1.265        | 3.870 |
|                                                                                         | Te1-O1   | 1.911(5)     | 1.195        |       |
|                                                                                         | Te1-O3   | 1.850(5)     | 1.410        |       |
|                                                                                         | Te2-O7#3 | 2.102(4)     | 0.713        | 4.004 |
|                                                                                         | Te2-O4   | 1.901(5)     | 1.228        |       |
|                                                                                         | Te2-O5   | 1.886(4)     | 1.279        |       |
|                                                                                         | Te2-O2#1 | 2.067(5)     | 0.784        |       |
|                                                                                         | Te3-O7   | 1.873(4)     | 1.325        | 3.756 |
|                                                                                         | Te3-O6   | 1.863(5)     | 1.361        |       |
|                                                                                         | Te3-O1#2 | 1.952(5)     | 1.070        |       |
|                                                                                         | Ga1-O4   | 1.900(4)     | 0.632        | 3.079 |
|                                                                                         | Ga1-O4#1 | 2.027(4)     | 0.448        |       |
|                                                                                         | Ga1-O5#4 | 1.994(4)     | 0.490        |       |
|                                                                                         | Ga1-O6   | 1.846(5)     | 0.731        |       |
| Ga1-O3                                                                                  | 1.823(5) | 0.778        |              |       |
| Ga <sub>2</sub> (OH)(TeO <sub>3</sub> )(Te <sub>2</sub> O <sub>5</sub> )Br ( <b>2</b> ) | Te1-O1   | 1.953(7)     | 1.067        | 3.896 |
|                                                                                         | Te1-O3   | 1.836(9)     | 1.464        |       |
|                                                                                         | Te1-O2   | 1.862(9)     | 1.365        |       |
|                                                                                         | Te2-O4   | 1.857(8)     | 1.383        | 3.879 |
|                                                                                         | Te2-O6   | 1.977(8)     | 1.000        |       |
|                                                                                         | Te2-O5   | 1.828(8)     | 1.496        |       |
|                                                                                         | Te3-O8   | 1.915(8)     | 1.182        | 3.685 |
|                                                                                         | Te3-O7   | 1.898(7)     | 1.238        |       |
|                                                                                         | Te3-O6   | 1.890(7)     | 1.265        |       |
|                                                                                         | Ga1-O9   | 1.995(8)     | 0.489        | 3.141 |
|                                                                                         | Ga1-O1#5 | 2.096(9)     | 0.372        |       |
|                                                                                         | Ga1-O8#1 | 1.991(9)     | 0.494        |       |
| Ga1-O7#6                                                                                | 2.014(8) | 0.464        |              |       |

|                                                                                                                           |           |           |       |       |
|---------------------------------------------------------------------------------------------------------------------------|-----------|-----------|-------|-------|
|                                                                                                                           | Ga1-O3    | 1.902(10) | 0.628 |       |
|                                                                                                                           | Ga1-O5    | 1.865(9)  | 0.694 |       |
|                                                                                                                           | Ga2-O9#1  | 1.989(8)  | 0.497 | 3.129 |
|                                                                                                                           | Ga2-O1#2  | 2.026(9)  | 0.449 |       |
|                                                                                                                           | Ga2-O8#3  | 2.027(8)  | 0.448 |       |
|                                                                                                                           | Ga2-O7    | 1.993(8)  | 0.491 |       |
|                                                                                                                           | Ga2-O4    | 1.906(8)  | 0.621 |       |
|                                                                                                                           | Ga2-O2#4  | 1.905(9)  | 0.623 |       |
| Ga <sub>2</sub> (OH)(TeO <sub>3</sub> )(Te <sub>2</sub> O <sub>5</sub> )Br <sub>0.5</sub> Cl <sub>0.5</sub><br><b>(3)</b> | Te1-O1    | 1.944(8)  | 1.093 | 3.973 |
|                                                                                                                           | Te1-O2    | 1.842(10) | 1.440 |       |
|                                                                                                                           | Te1-O3    | 1.842(11) | 1.440 |       |
|                                                                                                                           | Te2-O4    | 1.862(9)  | 1.365 | 3.928 |
|                                                                                                                           | Te2-O6    | 1.966(9)  | 1.030 |       |
|                                                                                                                           | Te2-O5    | 1.819(10) | 1.533 |       |
|                                                                                                                           | Te3-O8    | 1.901(9)  | 1.228 | 3.717 |
|                                                                                                                           | Te3-O7    | 1.895(9)  | 1.248 |       |
|                                                                                                                           | Te3-O6    | 1.897(8)  | 1.241 |       |
|                                                                                                                           | Ga1-O9    | 1.989(10) | 0.497 | 3.199 |
|                                                                                                                           | Ga1-O1#5  | 2.081(10) | 0.387 |       |
|                                                                                                                           | Ga1-O8#1  | 1.994(10) | 0.490 |       |
|                                                                                                                           | Ga1-O7#6  | 2.013(9)  | 0.465 |       |
|                                                                                                                           | Ga1-O5    | 1.873(10) | 0.679 |       |
|                                                                                                                           | Ga1-O3    | 1.872(11) | 0.681 |       |
|                                                                                                                           | Ga2-O9#1  | 1.992(10) | 0.493 | 3.118 |
|                                                                                                                           | Ga2-O1#2  | 2.026(10) | 0.449 |       |
|                                                                                                                           | Ga2-O8#3  | 2.026(9)  | 0.449 |       |
|                                                                                                                           | Ga2-O7    | 1.982(10) | 0.506 |       |
| Ga2-O4                                                                                                                    | 1.906(10) | 0.621     |       |       |
| Ga2-O2#4                                                                                                                  | 1.919(10) | 0.600     |       |       |
| Ga <sub>2</sub> (OH)(TeO <sub>3</sub> )(Te <sub>2</sub> O <sub>5</sub> )Cl <b>(4)</b>                                     | Te1-O1    | 1.942(9)  | 1.099 | 4.083 |
|                                                                                                                           | Te1-O3    | 1.823(14) | 1.516 |       |
|                                                                                                                           | Te1-O2    | 1.835(10) | 1.468 |       |
|                                                                                                                           | Te2-O4    | 1.857(10) | 1.383 | 3.909 |
|                                                                                                                           | Te2-O6    | 1.969(10) | 1.022 |       |
|                                                                                                                           | Te2-O5    | 1.826(10) | 1.504 |       |
|                                                                                                                           | Te3-O8    | 1.908(10) | 1.205 | 3.701 |
|                                                                                                                           | Te3-O7    | 1.897(10) | 1.241 |       |

|                                                                               |                                                                               |           |           |       |       |
|-------------------------------------------------------------------------------|-------------------------------------------------------------------------------|-----------|-----------|-------|-------|
|                                                                               | Te3-O6                                                                        | 1.893(9)  | 1.255     | 3.287 |       |
|                                                                               | Ga1-O9                                                                        | 1.966(10) | 0.528     |       |       |
|                                                                               | Ga1-O1#5                                                                      | 2.069(11) | 0.400     |       |       |
|                                                                               | Ga1-O8#1                                                                      | 1.981(11) | 0.507     |       |       |
|                                                                               | Ga1-O7#6                                                                      | 2.012(9)  | 0.467     |       |       |
|                                                                               | Ga1-O3                                                                        | 1.862(14) | 0.700     |       |       |
|                                                                               | Ga1-O5                                                                        | 1.870(10) | 0.685     |       |       |
|                                                                               |                                                                               | Ga2-O9#1  | 2.006(11) | 0.474 | 3.172 |
|                                                                               |                                                                               | Ga2-O1#2  | 2.013(11) | 0.465 |       |
|                                                                               |                                                                               | Ga2-O8#3  | 2.022(9)  | 0.454 |       |
|                                                                               |                                                                               | Ga2-O7    | 1.971(10) | 0.521 |       |
|                                                                               |                                                                               | Ga2-O4    | 1.899(9)  | 0.633 |       |
|                                                                               |                                                                               | Ga2-O2#4  | 1.904(10) | 0.625 |       |
|                                                                               | <b>Al<sub>2</sub>(OH)(TeO<sub>3</sub>)(Te<sub>2</sub>O<sub>5</sub>)Br (5)</b> | Te1-O1    | 1.960(5)  | 1.047 | 3.920 |
| Te1-O3                                                                        |                                                                               | 1.837(5)  | 1.460     |       |       |
| Te1-O2                                                                        |                                                                               | 1.849(5)  | 1.413     |       |       |
|                                                                               |                                                                               | Te2-O4    | 1.862(5)  | 1.365 | 3.863 |
|                                                                               |                                                                               | Te2-O6    | 1.966(5)  | 1.030 |       |
|                                                                               |                                                                               | Te2-O5    | 1.835(6)  | 1.468 |       |
|                                                                               |                                                                               | Te3-O8    | 1.912(5)  | 1.192 | 3.672 |
|                                                                               |                                                                               | Te3-O7    | 1.904(5)  | 1.218 |       |
|                                                                               |                                                                               | Te3-O6    | 1.891(5)  | 1.262 |       |
|                                                                               |                                                                               | A11-O9    | 1.930(5)  | 0.470 | 3.055 |
|                                                                               |                                                                               | A11-O1#6  | 2.005(5)  | 0.384 |       |
|                                                                               |                                                                               | A11-O8#2  | 1.922(6)  | 0.481 |       |
|                                                                               |                                                                               | A11-O7#7  | 1.937(6)  | 0.462 |       |
|                                                                               |                                                                               | A11-O3    | 1.843(6)  | 0.595 |       |
|                                                                               |                                                                               | A11-O5    | 1.803(7)  | 0.663 |       |
|                                                                               |                                                                               | A12-O9#2  | 1.926(5)  | 0.476 |       |
|                                                                               |                                                                               | A12-O1#3  | 1.978(5)  | 0.413 | 3.049 |
|                                                                               |                                                                               | A12-O8#4  | 1.949(6)  | 0.447 |       |
|                                                                               | A12-O7                                                                        | 1.907(6)  | 0.501     |       |       |
|                                                                               | A12-O4                                                                        | 1.829(6)  | 0.618     |       |       |
|                                                                               | A12-O2#5                                                                      | 1.844(6)  | 0.594     |       |       |
|                                                                               |                                                                               |           |           |       |       |
| <b>Al<sub>2</sub>(OH)(TeO<sub>3</sub>)(Te<sub>2</sub>O<sub>5</sub>)Cl (6)</b> | Te1-O1                                                                        | 1.948(6)  | 1.082     | 4.040 |       |
|                                                                               | Te1-O3                                                                        | 1.849(7)  | 1.413     |       |       |
|                                                                               | Te1-O2                                                                        | 1.816(7)  | 1.545     |       |       |

|  |           |          |       |       |
|--|-----------|----------|-------|-------|
|  | Te2-O4    | 1.884(7) | 0.336 | 3.834 |
|  | Te2-O6    | 2.036(7) | 0.223 |       |
|  | Te2-O5    | 1.831(8) | 0.387 |       |
|  | Te2'-O4#2 | 1.828(8) | 1.105 |       |
|  | Te2'-O6   | 1.995(6) | 0.704 |       |
|  | Te2'-O5#2 | 1.837(6) | 1.079 |       |
|  | Te3-O8    | 1.898(7) | 1.238 | 3.841 |
|  | Te3-O7    | 1.882(6) | 1.293 |       |
|  | Te3-O6    | 1.877(6) | 1.310 |       |
|  | A11-O9    | 1.902(7) | 0.507 | 3.103 |
|  | A11-O1#6  | 1.967(7) | 0.426 |       |
|  | A11-O8#1  | 1.906(8) | 0.502 |       |
|  | A11-O7#7  | 1.966(8) | 0.427 |       |
|  | A11-O3    | 1.822(8) | 0.630 |       |
|  | A11-O5    | 1.833(8) | 0.611 |       |
|  | A12-O9#1  | 1.936(7) | 0.463 | 3.115 |
|  | A12-O1#4  | 1.985(7) | 0.405 |       |
|  | A12-O8#5  | 1.917(9) | 0.487 |       |
|  | A12-O7    | 1.922(8) | 0.481 |       |
|  | A12-O4    | 1.811(9) | 0.649 |       |
|  | A12-O2#2  | 1.822(8) | 0.630 |       |

Symmetry transformations used to generate equivalent atoms:

For Ga(Te<sub>3</sub>O<sub>7</sub>)Br (**1**): #1 1-X, 1-Y, 1-Z; #2 +X, -1+Y, +Z; #3 +X, 1/2-Y, 1/2+Z; #4 1-X, -1/2+Y, 3/2-Z

For Ga<sub>2</sub>(OH)(TeO<sub>3</sub>)(Te<sub>2</sub>O<sub>5</sub>)Br (**2**): #1 1/2-X, +Y, -1/2+Z; #2 -1/2+X, 2-Y, +Z; #3 -X, 1-Y, -1/2+Z; #4 1/2-X, +Y, 1/2+Z; #5 1-X, 2-Y, 1/2+Z; #6 1/2+X, 1-Y, +Z

For Ga<sub>2</sub>(OH)(TeO<sub>3</sub>)(Te<sub>2</sub>O<sub>5</sub>)Br<sub>0.5</sub>Cl<sub>0.5</sub> (**3**): #1 3/2-X, +Y, 1/2+Z; #2 1/2+X, -Y, +Z; #3 2-X, 1-Y, 1/2+Z; #4 3/2-X, +Y, -1/2+Z; #5 1-X, -Y, -1/2+Z; #6 -1/2+X, 1-Y, +Z

For Ga<sub>2</sub>(OH)(TeO<sub>3</sub>)(Te<sub>2</sub>O<sub>5</sub>)Cl (**4**): #1 1/2-X, +Y, -1/2+Z; #2 -1/2+X, 2-Y, +Z; #3 -X, 1-Y, -1/2+Z; #4 1/2-X, +Y, 1/2+Z; #5 1-X, 2-Y, 1/2+Z; #6 1/2+X, 1-Y, +Z

For Al<sub>2</sub>(OH)(TeO<sub>3</sub>)(Te<sub>2</sub>O<sub>5</sub>)Br (**5**): #1 +X, 1+Y, +Z; #2 1/2-X, +Y, -1/2+Z; #3 -1/2+X, 2-Y, +Z; #4 -X, 1-Y, -1/2+Z; #5 1/2-X, +Y, 1/2+Z; #6 1-X, 2-Y, 1/2+Z; #7 1/2+X, 1-Y, +Z

For Al<sub>2</sub>(OH)(TeO<sub>3</sub>)(Te<sub>2</sub>O<sub>5</sub>)Cl (**6**): #1 1/2-X, +Y, -1/2+Z; #2 1/2-X, +Y, 1/2+Z; #3 -

1/2+X, 1-Y, +Z; #4 -1/2+X, 2-Y, +Z; #5 -X, 1-Y, -1/2+Z; #6 1-X, 2-Y, 1/2+Z; #7  
1/2+X, 1-Y, +Z

**Table S4.** Calculated the distortion of GaO<sub>6</sub> and AlO<sub>6</sub> octahedra for **2**, **3**, and **4** and **5**, **6**.

| Compounds                                                                                                                | Atoms      | Angle     | Distortion degree |       |
|--------------------------------------------------------------------------------------------------------------------------|------------|-----------|-------------------|-------|
| Ga <sub>2</sub> (OH)(TeO <sub>3</sub> )(Te <sub>2</sub> O <sub>5</sub> )Br ( <b>2</b> )                                  | O8-Ga1-O1  | 157.9°    | 0.357             |       |
|                                                                                                                          | O3-Ga1-O9  | 170.9°    |                   |       |
|                                                                                                                          | O5-Ga1-O7  | 176.4°    |                   |       |
|                                                                                                                          |            | O7-Ga2-O1 | 159.9°            | 0.242 |
|                                                                                                                          |            | O2-Ga2-O9 | 171.6°            |       |
|                                                                                                                          |            | O4-Ga2-O8 | 174.5°            |       |
| Ga <sub>2</sub> (OH)(TeO <sub>3</sub> )(Te <sub>2</sub> O <sub>5</sub> )Br <sub>0.5</sub> Cl <sub>0.5</sub> ( <b>3</b> ) | O81-Ga1-O1 | 158.2°    | 0.352             |       |
|                                                                                                                          | O3-Ga1-O9  | 171.3°    |                   |       |
|                                                                                                                          | O5-Ga1-O7  | 176.4°    |                   |       |
|                                                                                                                          |            | O7-Ga2-O1 | 160.3°            | 0.241 |
|                                                                                                                          |            | O2-Ga2-O9 | 172.0°            |       |
|                                                                                                                          |            | O4-Ga2-O8 | 175.4°            |       |
| Ga <sub>2</sub> (OH)(TeO <sub>3</sub> )(Te <sub>2</sub> O <sub>5</sub> )Cl ( <b>4</b> )                                  | O8-Ga1-O1  | 158.6°    | 0.342             |       |
|                                                                                                                          | O3-Ga1-O9  | 172.0°    |                   |       |
|                                                                                                                          | O5-Ga1-O7  | 176.0°    |                   |       |
|                                                                                                                          |            | O7-Ga2-O1 | 160.7°            | 0.271 |
|                                                                                                                          |            | O2-Ga2-O9 | 172.2°            |       |
|                                                                                                                          |            | O4-Ga2-O8 | 176.8°            |       |
| Al <sub>2</sub> (OH)(TeO <sub>3</sub> )(Te <sub>2</sub> O <sub>5</sub> )Br ( <b>5</b> )                                  | O8-Al1-O1  | 159.4°    | 0.311             |       |
|                                                                                                                          | O3-Al1-O9  | 171.3°    |                   |       |

|                                                                                         |           |        |       |
|-----------------------------------------------------------------------------------------|-----------|--------|-------|
|                                                                                         | O5-Al1-O7 | 177.1° | 0.279 |
|                                                                                         | O7-Al2-O1 | 160.7° |       |
|                                                                                         | O2-Al2-O9 | 171.0° |       |
|                                                                                         | O4-Al2-O  | 174.0° |       |
| Al <sub>2</sub> (OH)(TeO <sub>3</sub> )(Te <sub>2</sub> O <sub>5</sub> )Cl ( <b>6</b> ) | O8-Al1-O1 | 160.0° | 0.279 |
|                                                                                         | O3-Al1-O9 | 171.4° |       |
|                                                                                         | O5-Al1-O7 | 177.2° |       |
|                                                                                         | O7-Al2-O1 | 160.7° | 0.288 |
|                                                                                         | O2-Al2-O9 | 172.2° |       |
|                                                                                         | O4-Al2-O8 | 178.1° |       |

**Table S5.** Calculated dipole moments for TeO<sub>3</sub> and GaO<sub>6</sub> (AlO<sub>6</sub>), as well as net dipole moment for a unit cell in **2**, **3**, **4**, **5**, and **6**.

| Ga <sub>2</sub> (OH)(TeO <sub>3</sub> )(Te <sub>2</sub> O <sub>5</sub> )Br ( <b>2</b> )                                  |                            |                |               |               |
|--------------------------------------------------------------------------------------------------------------------------|----------------------------|----------------|---------------|---------------|
| Polar unit                                                                                                               | Dipole moment (D = Debyes) |                |               |               |
|                                                                                                                          | Total magnitude            | X-component    | Y-component   | Z-component   |
| Te(1)O <sub>3</sub>                                                                                                      | 11.978                     | (± 11.238) × 2 | (± 4.129) × 2 | 0.365 × 4     |
| Te(2)O <sub>3</sub>                                                                                                      | 11.325                     | (± 3.209) × 2  | (± 8.817) × 2 | (- 6.342) × 4 |
| Te(3)O <sub>3</sub>                                                                                                      | 10.178                     | (± 2.712) × 2  | (± 9.810) × 2 | (- 0.011) × 4 |
| Ga(1)O <sub>6</sub>                                                                                                      | 3.245                      | (± 2.343) × 2  | (± 0.539) × 2 | 2.179 × 4     |
| Ga(2)O <sub>6</sub>                                                                                                      | 2.120                      | (± 0.890) × 2  | (± 1.266) × 2 | (- 1.448) × 4 |
| Net dipole moment (a unit cell)                                                                                          | 21.028                     | 0              | 0             | - 21.028      |
| Ga <sub>2</sub> (OH)(TeO <sub>3</sub> )(Te <sub>2</sub> O <sub>5</sub> )Br <sub>0.5</sub> Cl <sub>0.5</sub> ( <b>3</b> ) |                            |                |               |               |
| Polar unit                                                                                                               | Dipole moment (D = Debyes) |                |               |               |
|                                                                                                                          | Total magnitude            | X-component    | Y-component   | Z-component   |
| Te(1)O <sub>3</sub>                                                                                                      | 12.570                     | (± 11.846) × 2 | (± 4.193) × 2 | 0.299 × 4     |
| Te(2)O <sub>3</sub>                                                                                                      | 11.735                     | (± 3.692) × 2  | (± 8.983) × 2 | (- 6.585) × 4 |
| Te(3)O <sub>3</sub>                                                                                                      | 10.243                     | (± 2.935) × 2  | (± 9.814) × 2 | 0.009 × 4     |
| Ga(1)O <sub>6</sub>                                                                                                      | 3.404                      | (± 2.683) × 2  | (± 0.147) × 2 | 2.090 × 4     |
| Ga(2)O <sub>6</sub>                                                                                                      | 2.015                      | (± 0.825) × 2  | (± 1.258) × 2 | (- 1.341) × 4 |
| Net dipole moment (a unit cell)                                                                                          | 22.112                     | 0              | 0             | - 22.112      |

| Ga <sub>2</sub> (OH)(TeO <sub>3</sub> )(Te <sub>2</sub> O <sub>5</sub> )Cl ( <b>4</b> ) |                            |                |                |               |
|-----------------------------------------------------------------------------------------|----------------------------|----------------|----------------|---------------|
| Polar unit                                                                              | Dipole moment (D = Debyes) |                |                |               |
|                                                                                         | Total magnitude            | X-component    | Y-component    | Z-component   |
| Te(1)O <sub>3</sub>                                                                     | 13.072                     | (± 12.418) × 2 | (± 4.050) × 2  | 0.538 × 4     |
| Te(2)O <sub>3</sub>                                                                     | 11.566                     | (± 3.778) × 2  | (± 8.074) × 2  | (- 6.614) × 4 |
| Te(3)O <sub>3</sub>                                                                     | 10.260                     | (± 2.959) × 2  | (± 9.823) × 2  | (- 0.135) × 4 |
| Ga(1)O <sub>6</sub>                                                                     | 3.537                      | (± 2.924) × 2  | (± 0.040) × 2  | 1.990 × 4     |
| Ga(2)O <sub>6</sub>                                                                     | 1.920                      | (± 0.919) × 2  | (± 1.032) × 2  | (- 1.332) × 4 |
| Net dipole moment (a unit cell)                                                         | 22.212                     | 0              | 0              | - 22.212      |
| Al <sub>2</sub> (OH)(TeO <sub>3</sub> )(Te <sub>2</sub> O <sub>5</sub> )Br ( <b>5</b> ) |                            |                |                |               |
| Polar unit                                                                              | Dipole moment (D = Debyes) |                |                |               |
|                                                                                         | Total magnitude            | X-component    | Y-component    | Z-component   |
| Te(1)O <sub>3</sub>                                                                     | 11.830                     | (± 11.194) × 2 | (± 3.821) × 2  | 0.197 × 4     |
| Te(2)O <sub>3</sub>                                                                     | 11.430                     | (± 2.910) × 2  | (± 9.070) × 2  | (- 6.317) × 4 |
| Te(3)O <sub>3</sub>                                                                     | 10.294                     | (± 2.417) × 2  | (± 10.007) × 2 | (- 0.013) × 4 |
| Al(1)O <sub>6</sub>                                                                     | 5.178                      | (± 3.837) × 2  | (± 1.483) × 2  | 3.144 × 4     |
| Al(2)O <sub>6</sub>                                                                     | 4.027                      | (± 2.005) × 2  | (± 2.061) × 2  | (- 2.818) × 4 |
| Net dipole moment (a unit cell)                                                         | 23.228                     | 0              | 0              | - 23.228      |
| Al <sub>2</sub> (OH)(TeO <sub>3</sub> )(Te <sub>2</sub> O <sub>5</sub> )Cl ( <b>6</b> ) |                            |                |                |               |
| Polar unit                                                                              | Dipole moment (D = Debyes) |                |                |               |
|                                                                                         | Total magnitude            | X-component    | Y-component    | Z-component   |
| Te(1)O <sub>3</sub>                                                                     | 12.642                     | (± 12.020) × 2 | (± 3.897) × 2  | (- 0.374) × 4 |
| Te(2)O <sub>3</sub>                                                                     | 9.986                      | (± 2.921) × 2  | (± 7.528) × 2  | (- 5.875) × 4 |
| Te(3)O <sub>3</sub>                                                                     | 10.816                     | (± 2.752) × 2  | (± 10.459) × 2 | (- 0.105) × 4 |
| Al(1)O <sub>6</sub>                                                                     | 4.417                      | (± 2.818) × 2  | (± 1.457) × 2  | 3.073 × 4     |
| Al(2)O <sub>6</sub>                                                                     | 4.789                      | (± 3.244) × 2  | (± 1.368) × 2  | (- 3.247) × 4 |
| Net dipole moment (a unit cell)                                                         | 26.112                     | 0              | 0              | - 26.112      |

**Table S6.** State energies (eV) of the highest valence band (H-VB) and the lowest conduction band (L-CB) of **1**, **2**, **4**, and **6**.

| Compound                                           | K-point                  | H-VB     | L-CB    |
|----------------------------------------------------|--------------------------|----------|---------|
| Ga(Te <sub>2</sub> O <sub>5</sub> )Br ( <b>1</b> ) | Z (0.000, 0.000, 0.500)  | -0.25827 | 3.03387 |
|                                                    | G (0.000, 0.000, 0.000)  | -0.02442 | 2.93471 |
|                                                    | Y (0.000, 0.500, 0.000)  | -0.31239 | 2.91705 |
|                                                    | A (-0.500, 0.500, 0.000) | -0.25023 | 2.82872 |

|                                                                                   |                          |          |         |
|-----------------------------------------------------------------------------------|--------------------------|----------|---------|
|                                                                                   | B (-0.500, 0.000, 0.000) | 0        | 2.72851 |
|                                                                                   | D (-0.500, 0.000, 0.500) | -0.29803 | 3.04776 |
|                                                                                   | E (-0.500, 0.500, 0.500) | -0.42992 | 2.99728 |
|                                                                                   | C (0.000, 0.500, 0.500)  | -0.39945 | 2.79095 |
| Ga <sub>2</sub> (OH)(TeO <sub>3</sub> )(Te <sub>2</sub> O <sub>5</sub> )Br<br>(2) | G (0.000, 0.000, 0.000)  | -0.06906 | 2.79717 |
|                                                                                   | Z (0.000, 0.000, 0.500)  | -0.48274 | 3.12586 |
|                                                                                   | T (-0.500, 0.000, 0.500) | -0.50390 | 3.17356 |
|                                                                                   | Y (-0.500, 0.000, 0.000) | -0.17540 | 2.90504 |
|                                                                                   | S (-0.500, 0.500, 0.000) | -0.06755 | 3.00608 |
|                                                                                   | X (0.000, 0.500, 0.000)  | 0        | 2.98853 |
|                                                                                   | U (0.000, 0.500, 0.500)  | -0.36947 | 3.35915 |
|                                                                                   | R (-0.500, 0.500, 0.500) | -0.40104 | 3.35674 |
| Ga <sub>2</sub> (OH)(TeO <sub>3</sub> )(Te <sub>2</sub> O <sub>5</sub> )Cl<br>(4) | G (0.000, 0.000, 0.000)  | -0.11452 | 2.93685 |
|                                                                                   | Z (0.000, 0.000, 0.500)  | -0.49254 | 3.26787 |
|                                                                                   | T (-0.500, 0.000, 0.500) | -0.49740 | 3.30744 |
|                                                                                   | Y (-0.500, 0.000, 0.000) | -0.22251 | 3.04639 |
|                                                                                   | S (-0.500, 0.500, 0.000) | -0.08651 | 3.16907 |
|                                                                                   | X (0.000, 0.500, 0.000)  | 0        | 3.16528 |
|                                                                                   | U (0.000, 0.500, 0.500)  | -0.37229 | 3.51408 |
|                                                                                   | R (-0.500, 0.500, 0.500) | -0.39142 | 3.50828 |
| Al <sub>2</sub> (OH)(TeO <sub>3</sub> )(Te <sub>2</sub> O <sub>5</sub> )Cl<br>(6) | G (0.000, 0.000, 0.000)  | -0.10572 | 3.11568 |
|                                                                                   | Z (0.000, 0.000, 0.500)  | -0.49760 | 3.38833 |
|                                                                                   | T (-0.500, 0.000, 0.500) | -0.50333 | 3.46204 |
|                                                                                   | Y (-0.500, 0.000, 0.000) | -0.24190 | 3.21278 |
|                                                                                   | S (-0.500, 0.500, 0.000) | -0.08987 | 3.30093 |
|                                                                                   | X (0.000, 0.500, 0.000)  | 0        | 3.27680 |
|                                                                                   | U (0.000, 0.500, 0.500)  | -0.37766 | 3.65408 |
|                                                                                   | R (-0.500, 0.500, 0.500) | -0.41309 | 3.65473 |



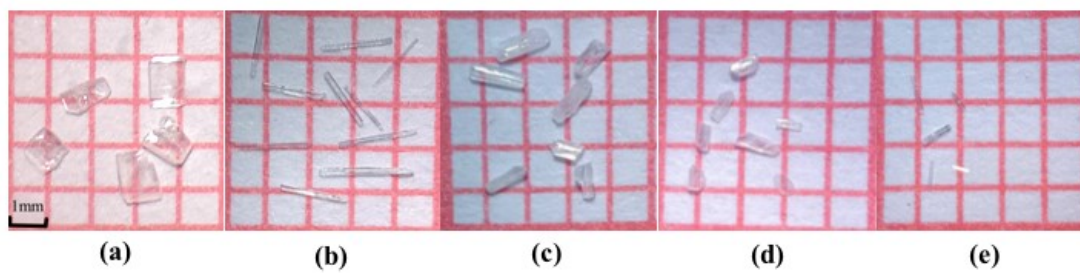

**Figure S1.** As-grown small crystals of **1** (a), **2** (b), **3** (c), **4** (d), and **6** (e).

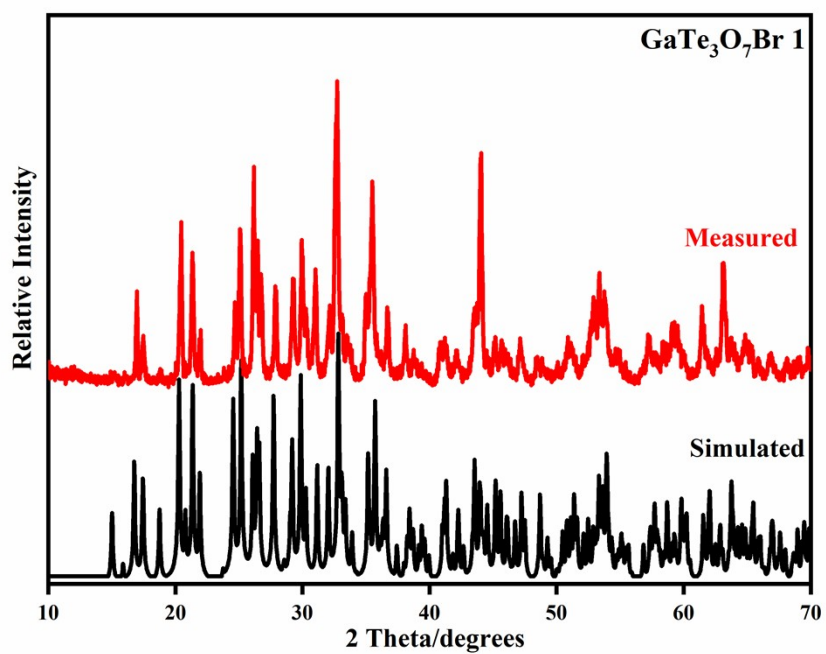

**(a)**

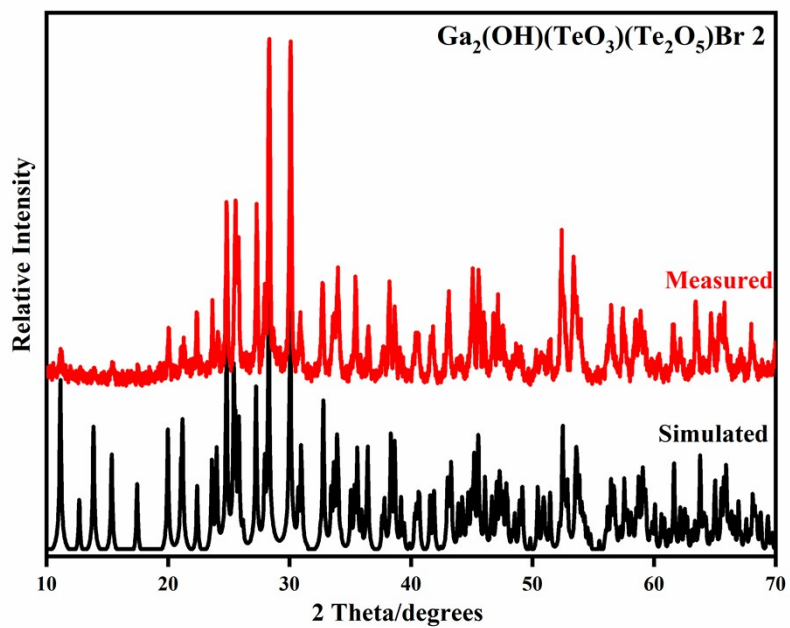

(b)

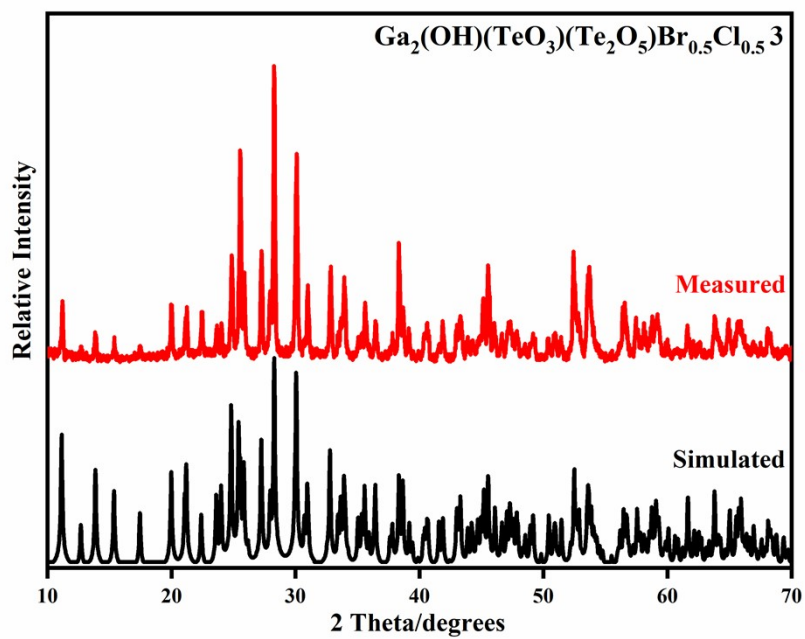

(c)

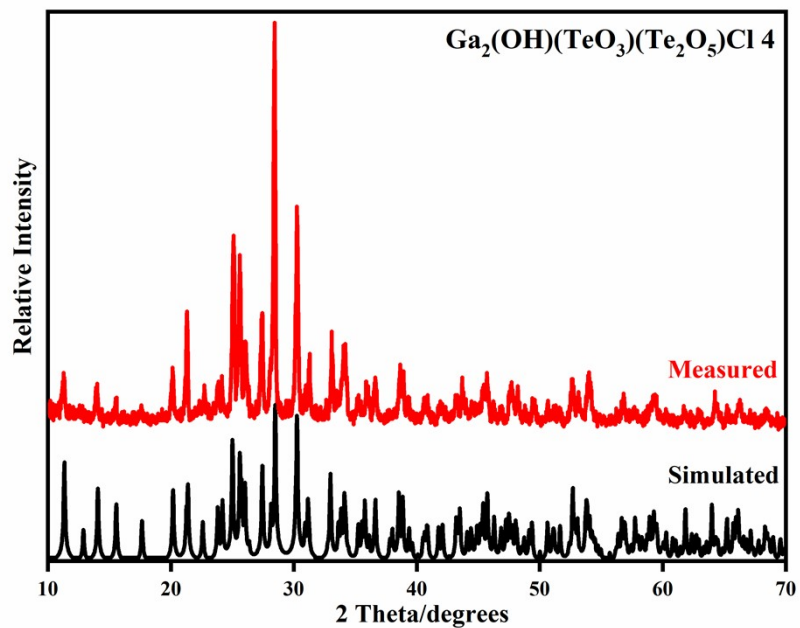

(d)

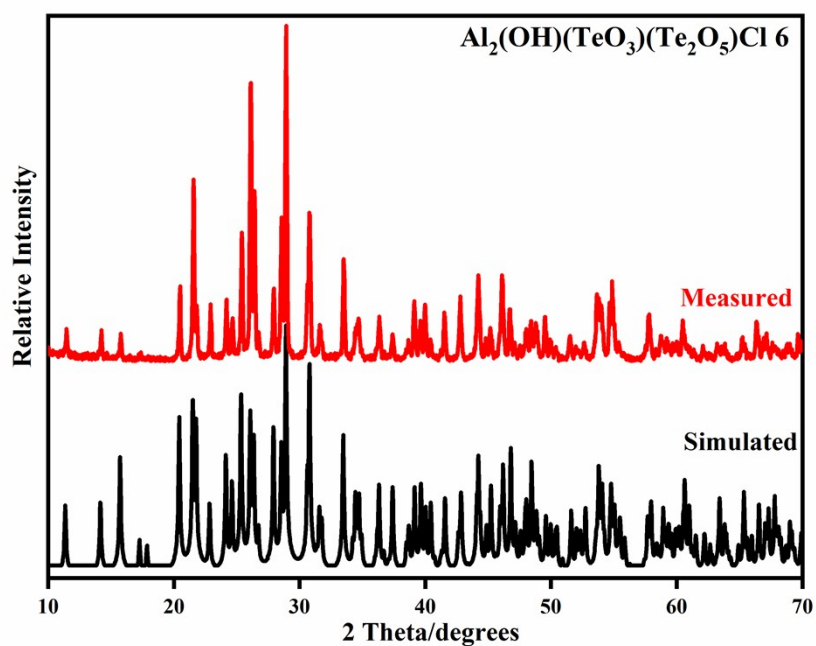

(e)

**Figure S2.** Simulated and experimental XRD powder patterns of **1** (a), **2** (b), **3** (c), **4** (d), and **6** (e).

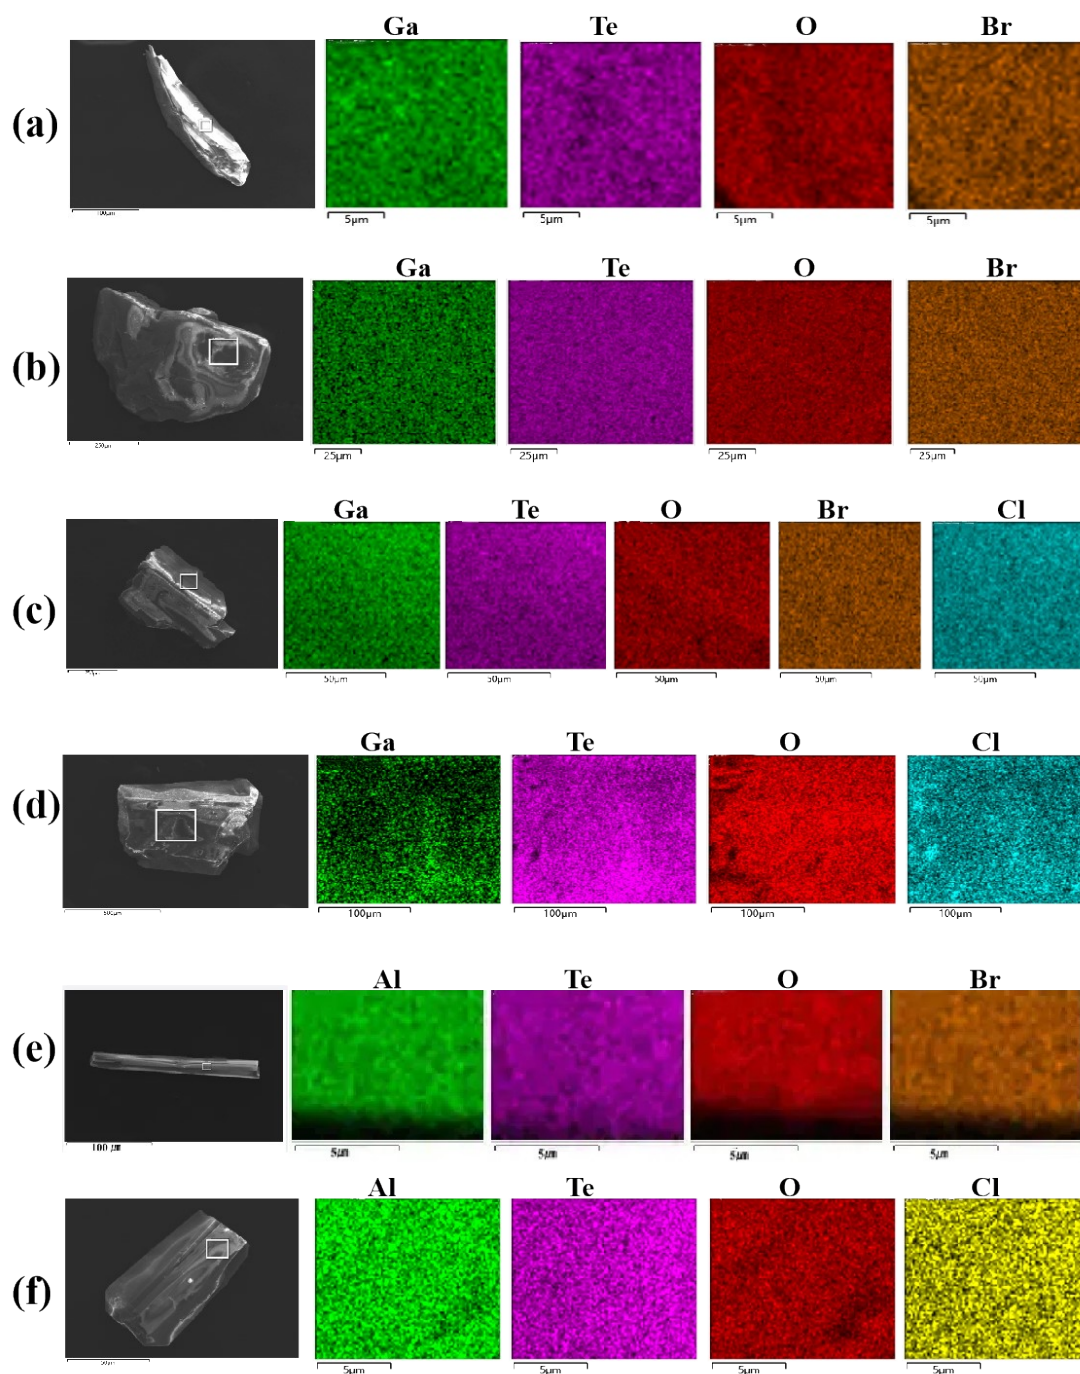

**Figure S3.** SEM images of 1 (a), 2 (b), 3 (c), 4 (d), 5 (e) and 6 (f) and their elemental distribution maps.

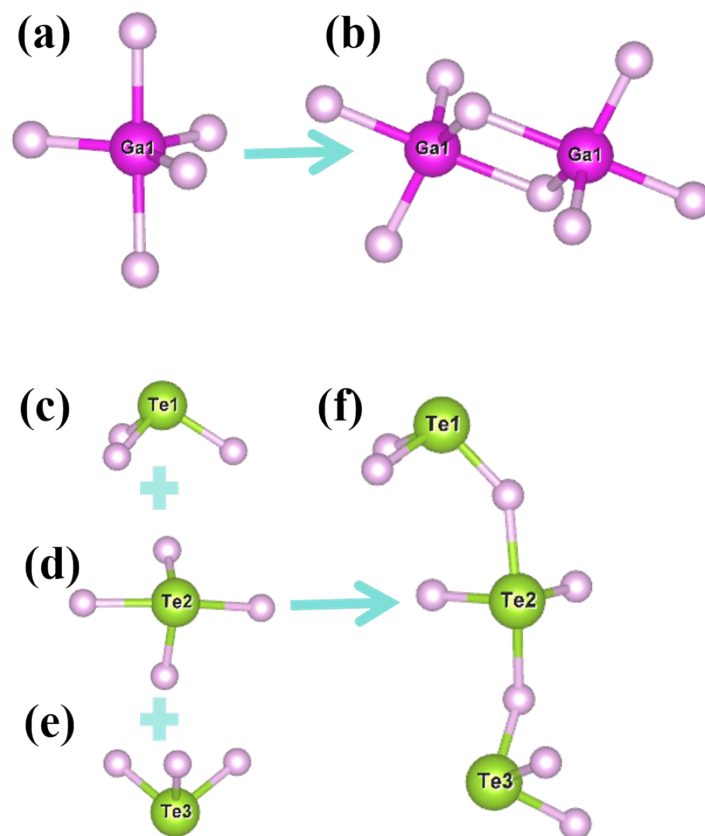

**Figure S4.** Coordination environments of the Te and Ga atoms in **1**.

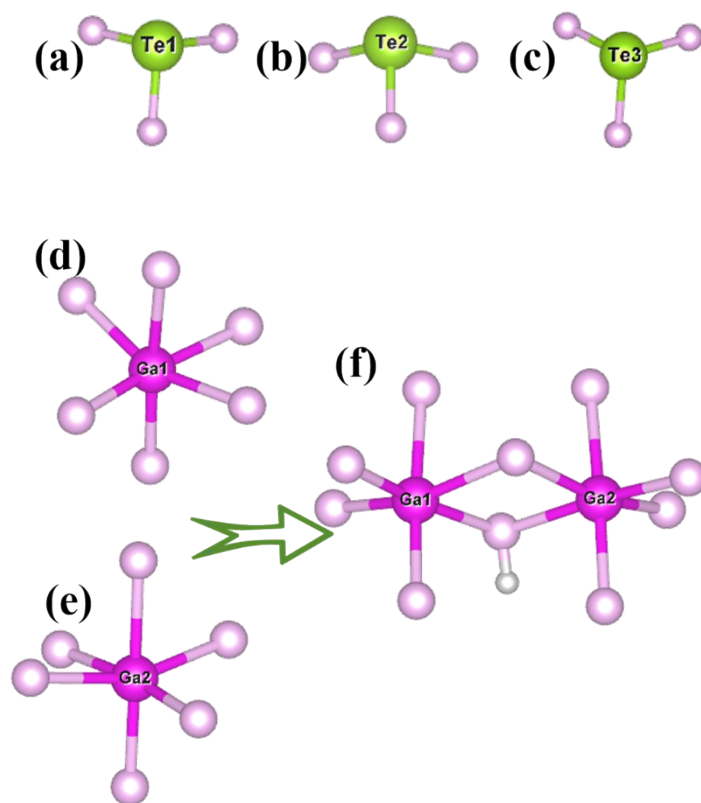

**Figure S5.** Coordination environments of the Te and Ga atoms in **2**.

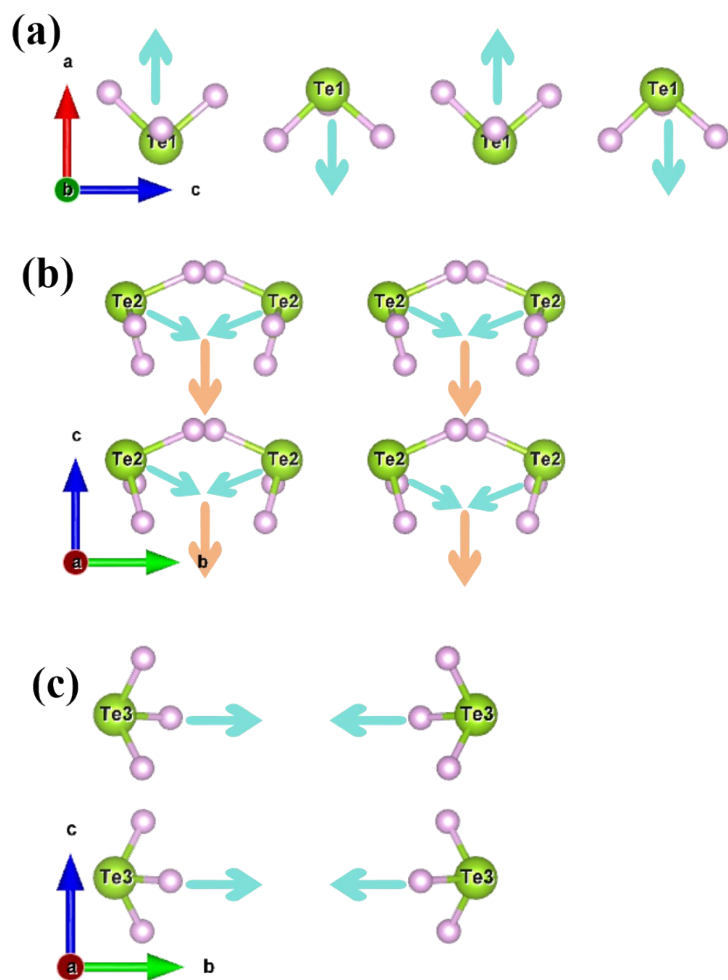

**Figure S6.** The orientation of the dipole moment of [Te(1)O<sub>3</sub>]<sup>2-</sup> (a), [Te(2)O<sub>3</sub>]<sup>2-</sup> (b), and [Te(3)O<sub>3</sub>]<sup>2-</sup> (c) trigonal pyramids in **2**, arrows indicate the direction of the dipole moments.

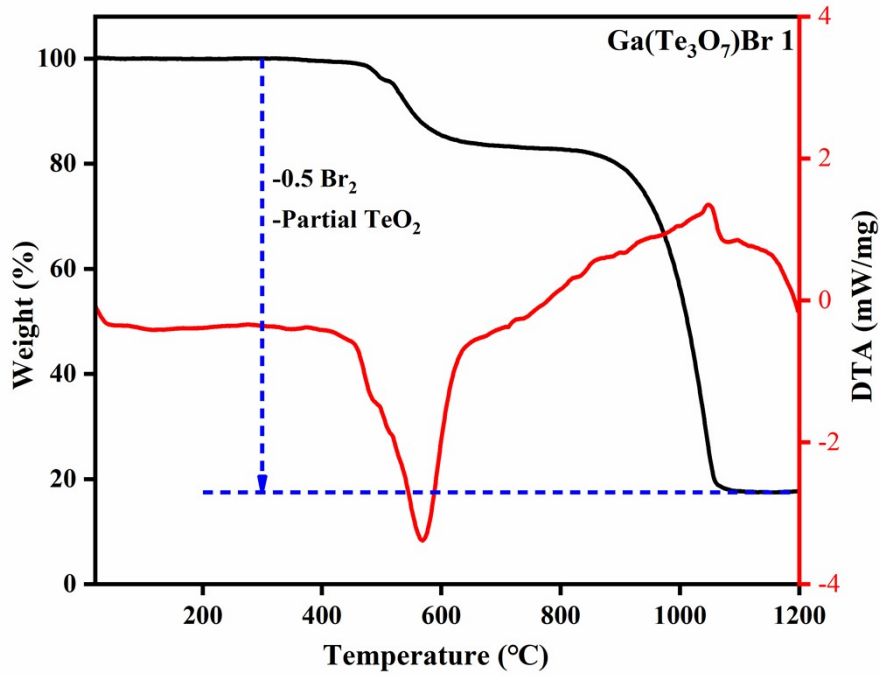

(a)

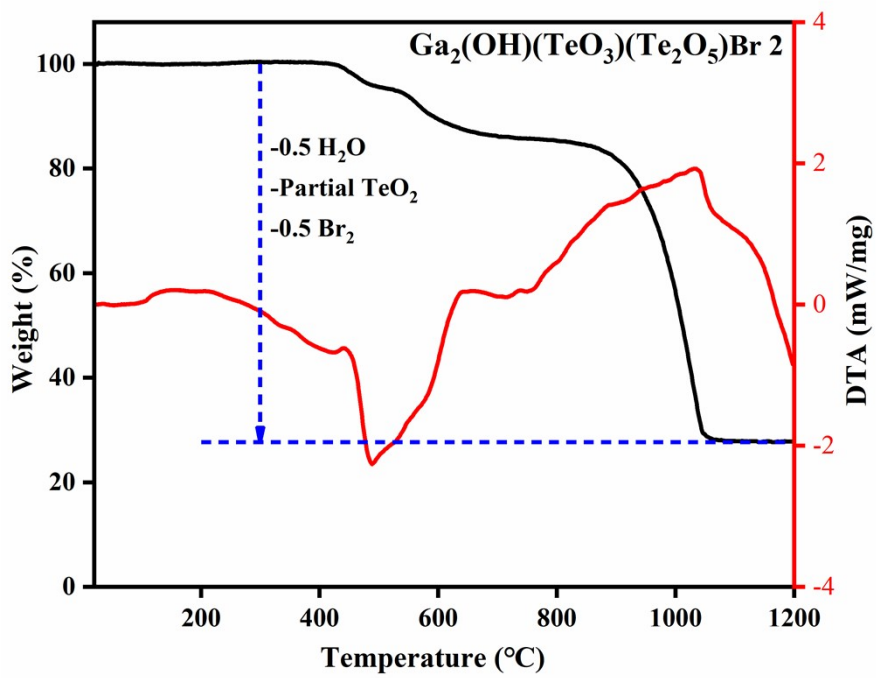

(b)

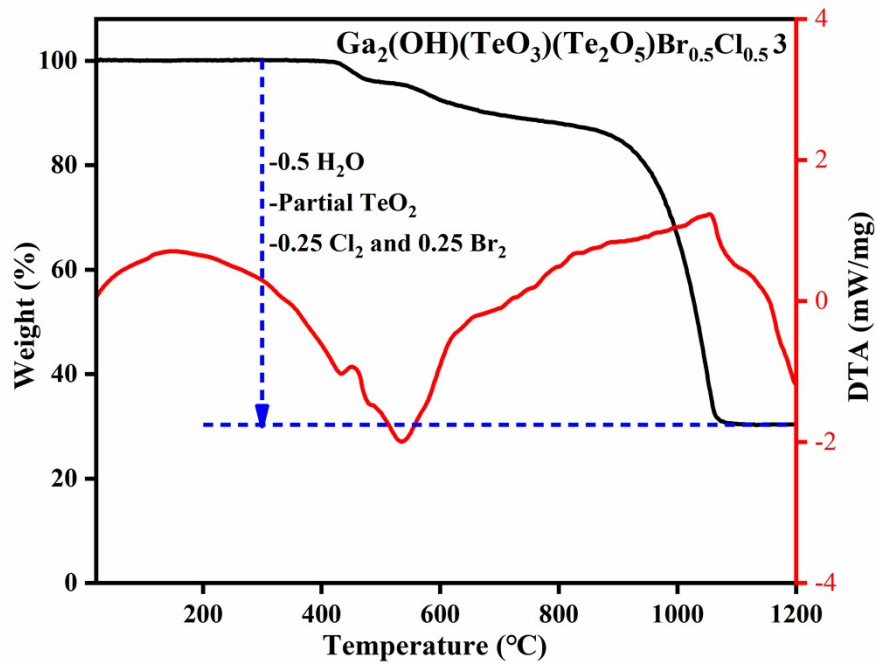

(c)

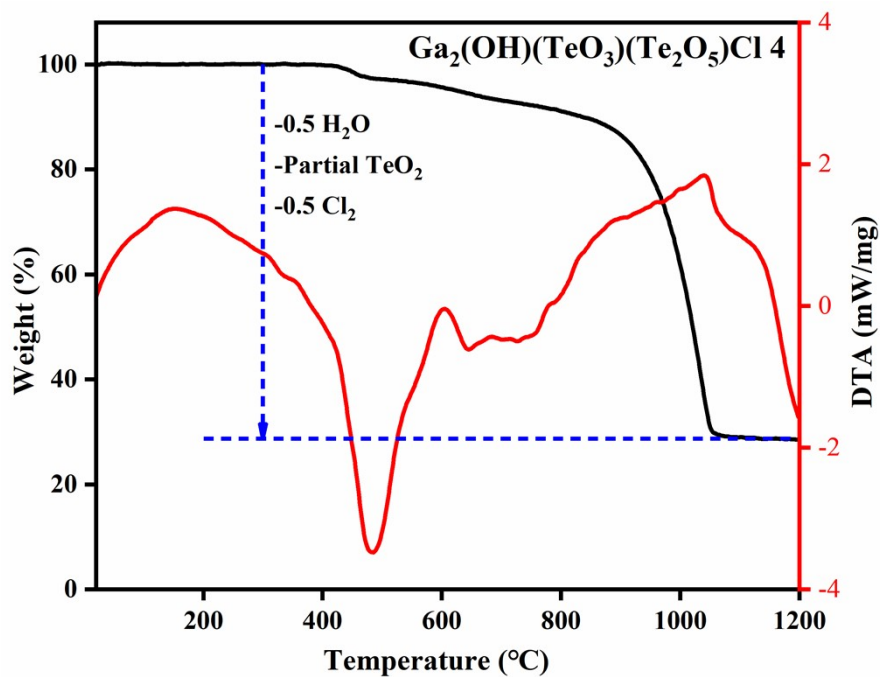

(d)



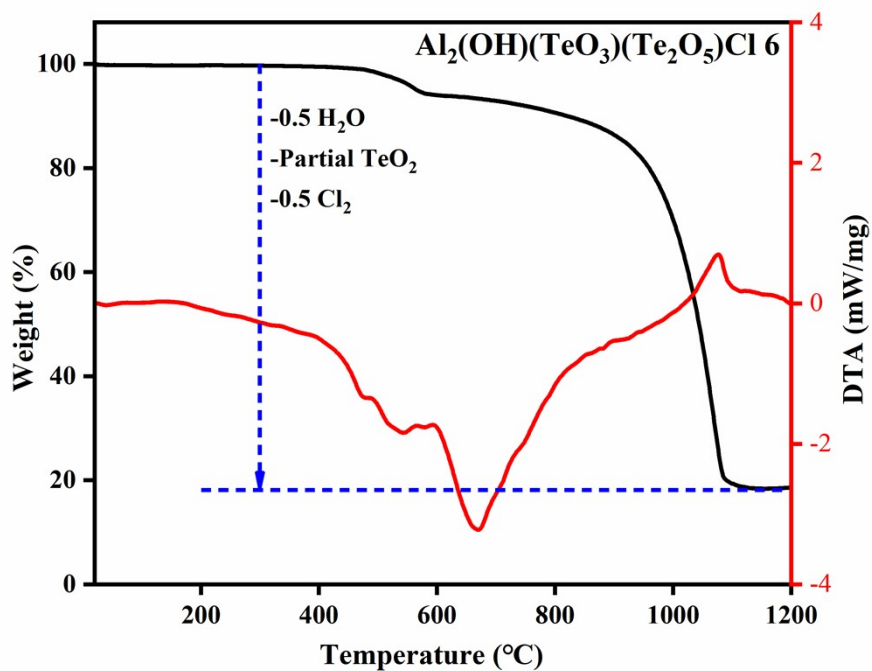

(e)

Figure S7. TG and DTA curves of 1 (a), 2 (b), 3 (c), 4 (d), and 6 (e) under  $\text{N}_2$  atmosphere.

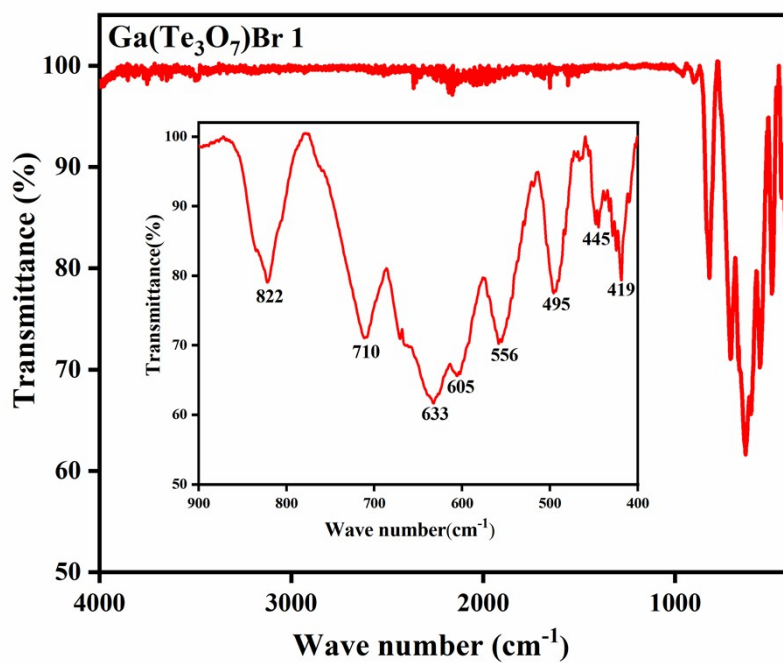

(a)

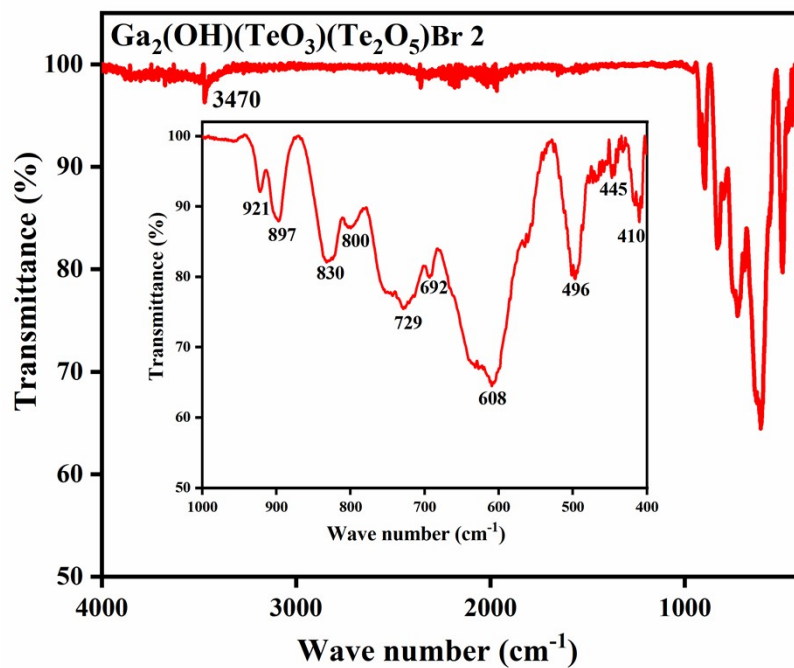

(b)

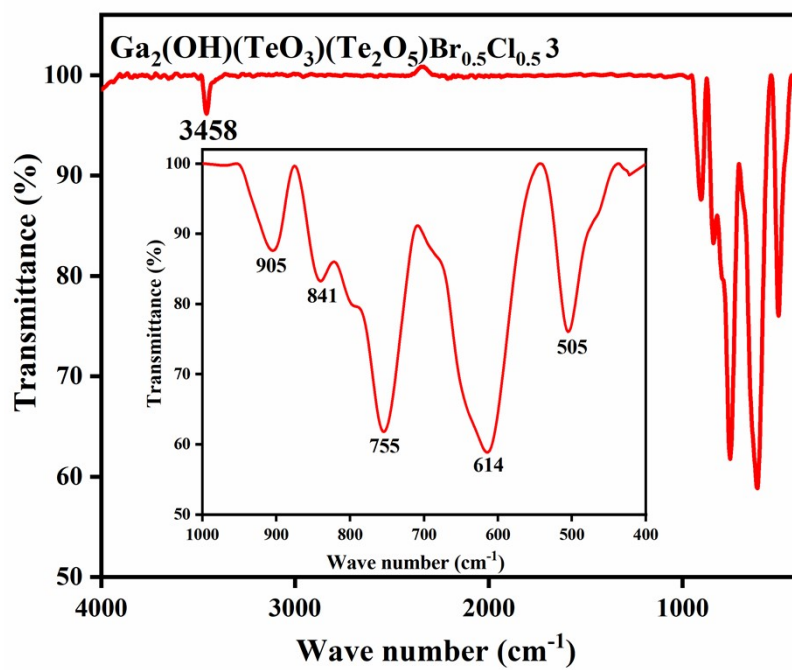

(c)

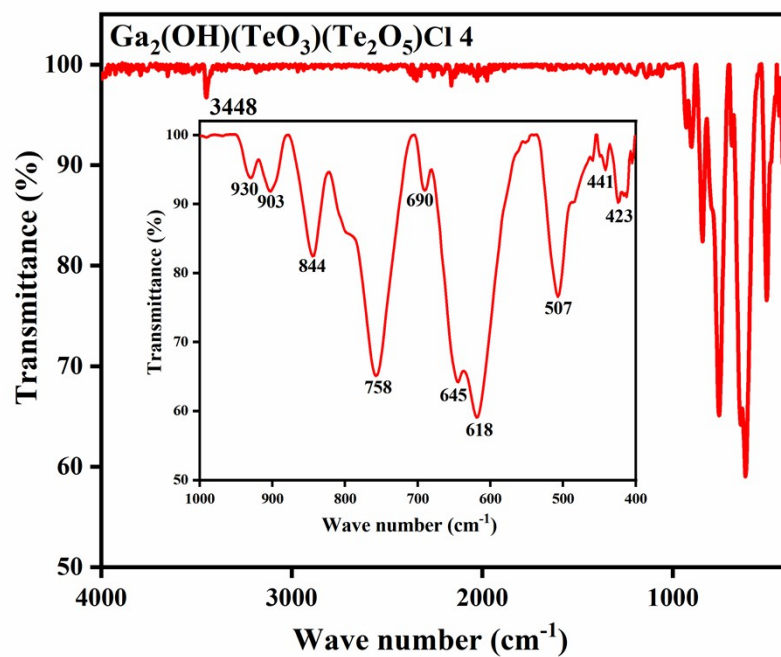

(d)

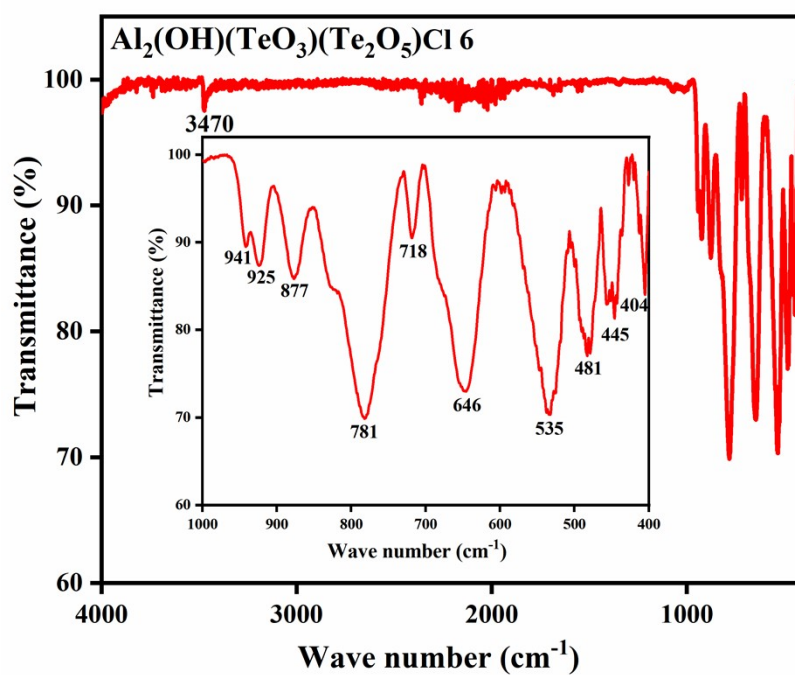

(e)

Figure S8. Infrared spectra of 1 (a), 2 (b), 3 (c), 4 (d), and 6 (e).

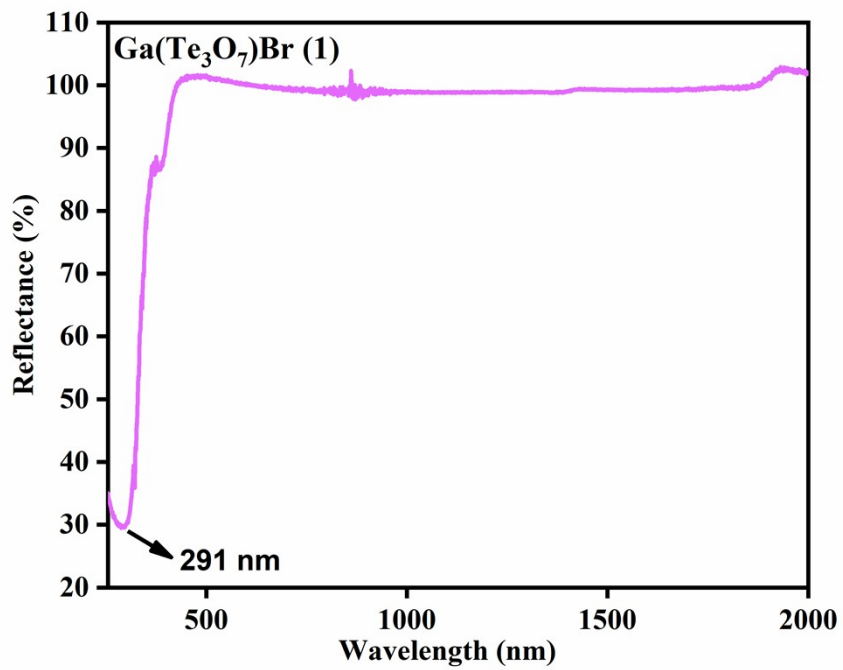

(a)

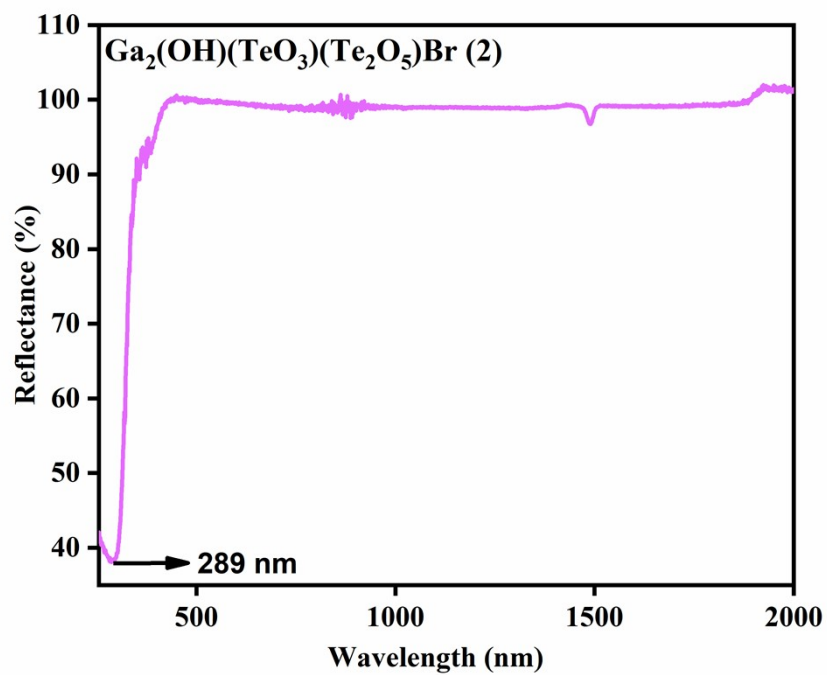

(b)

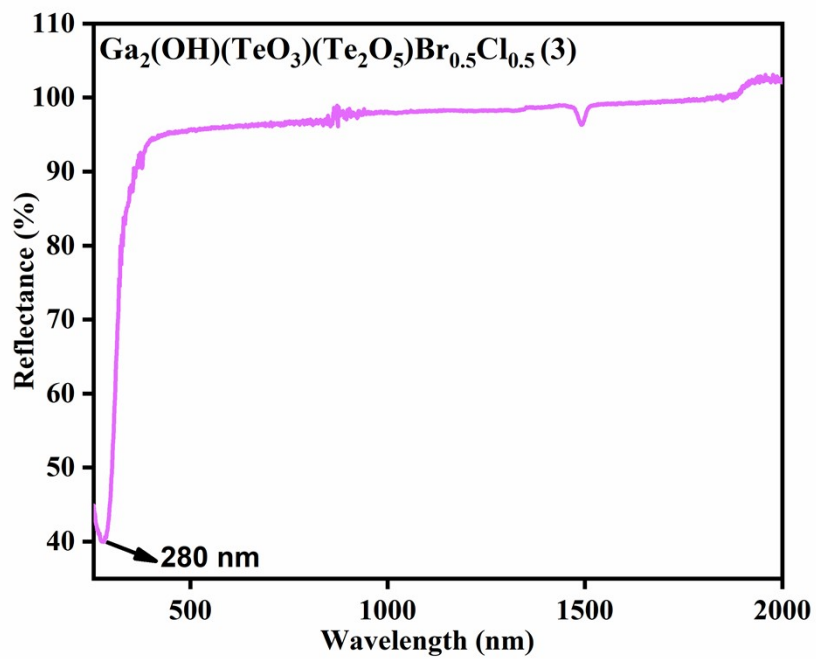

(c)

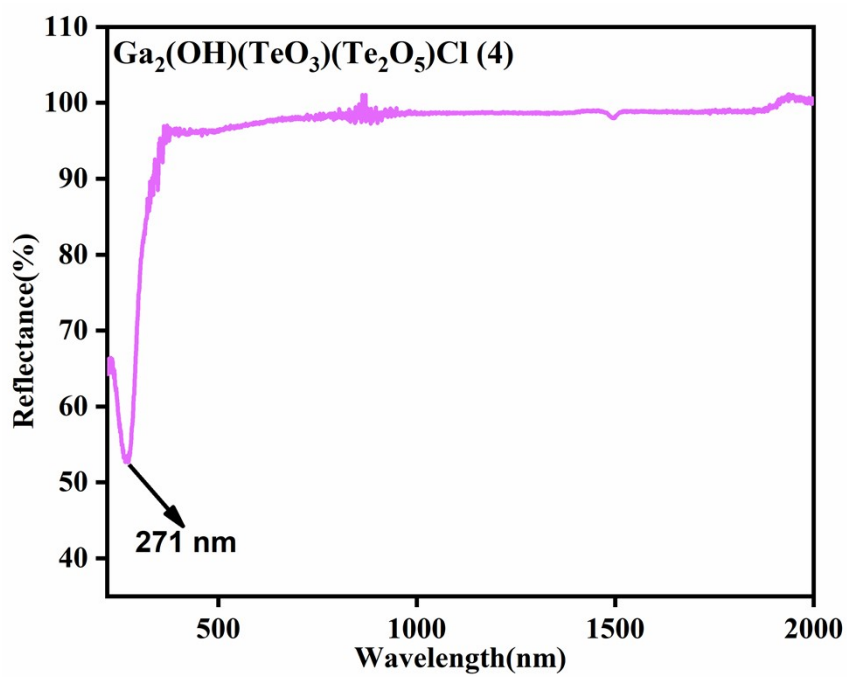

(d)

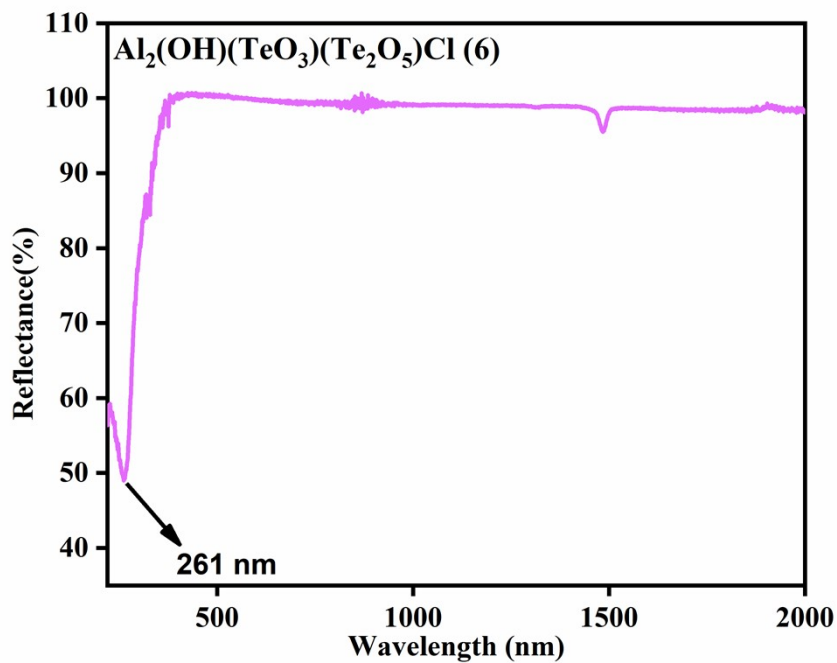

(e)

**Figure S9.** UV-vis-NIR diffuse reflectance spectra of **1** (a), **2** (b), **3** (c), **4** (d), and **6** (e).

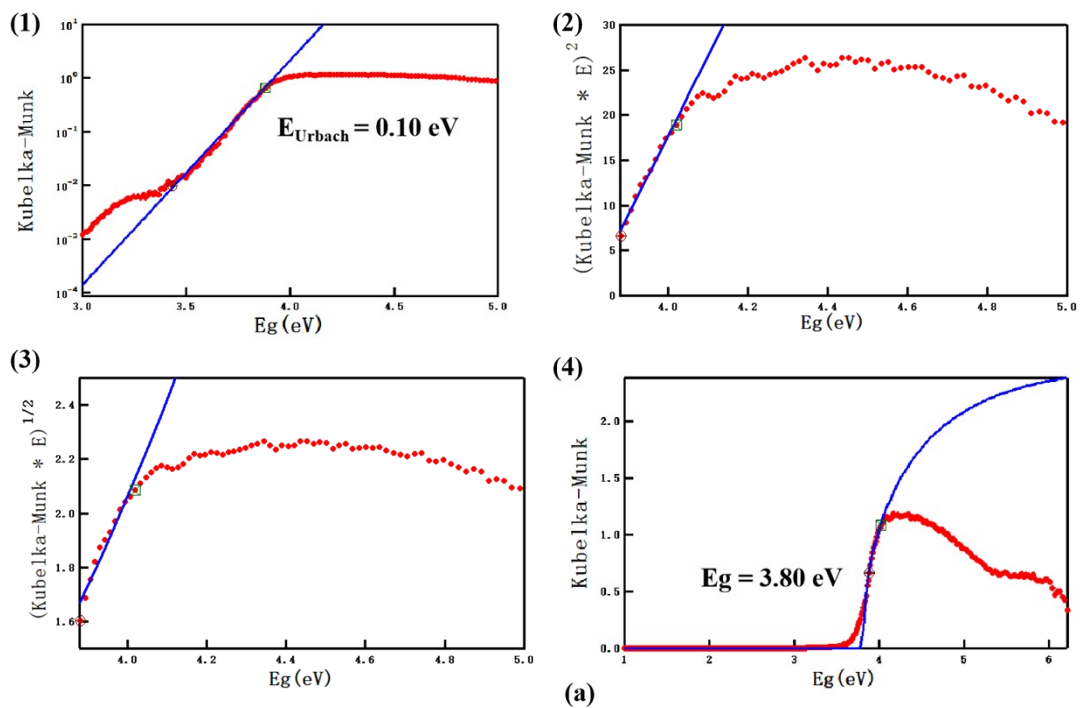

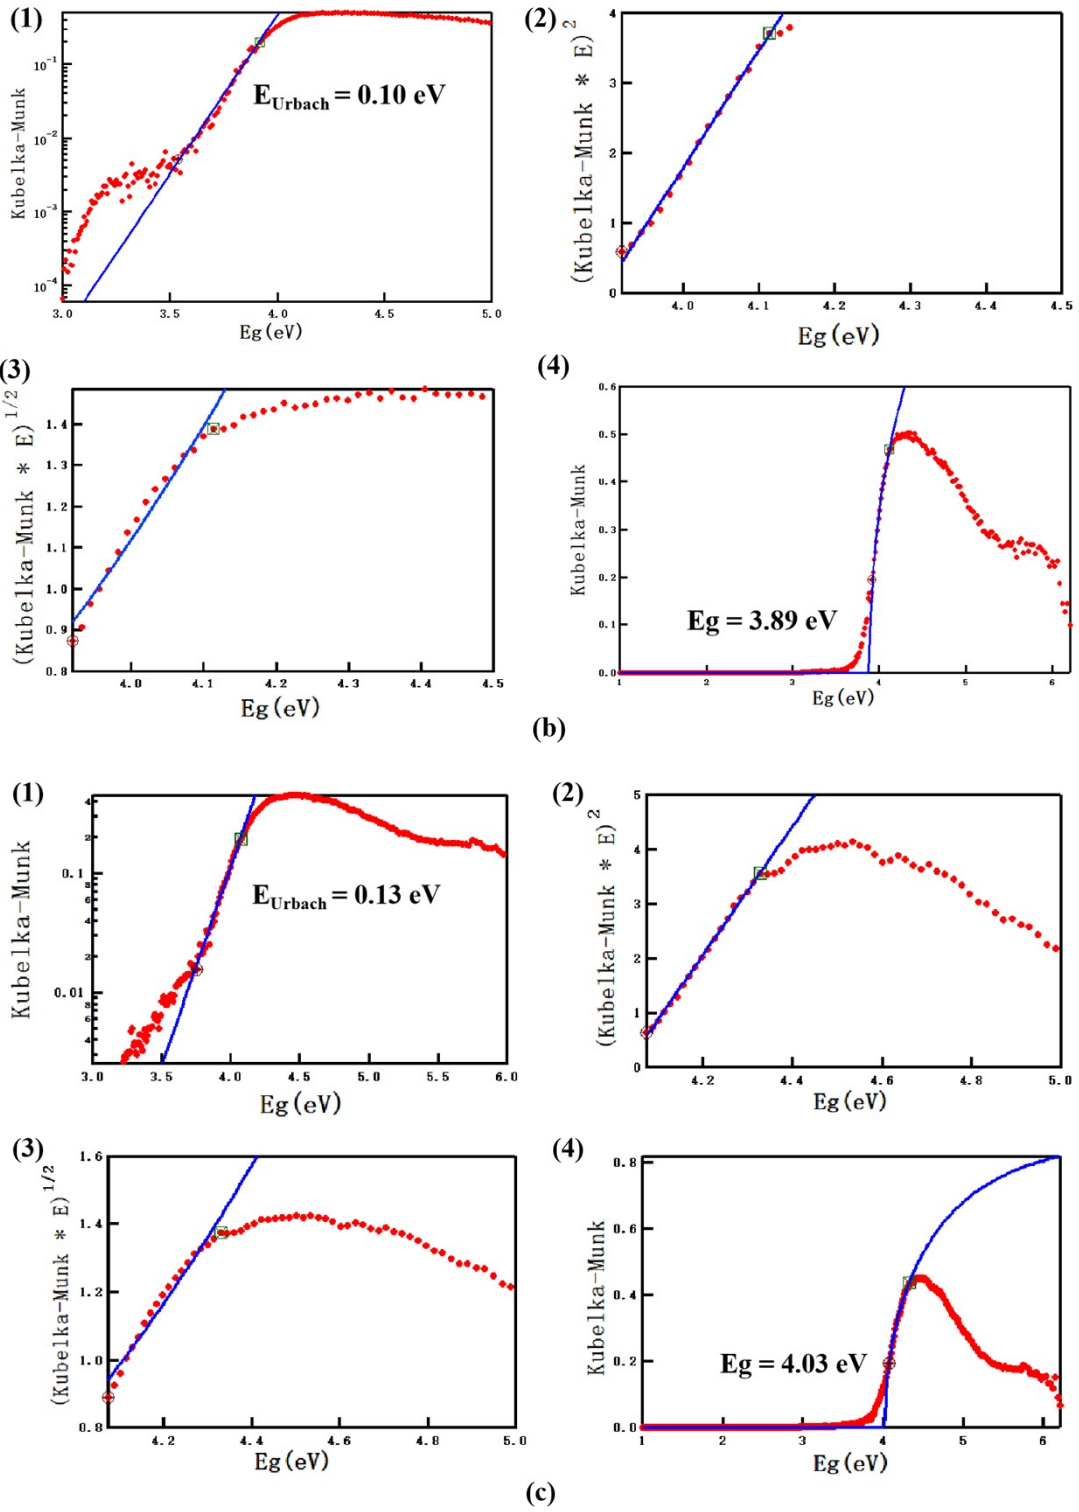

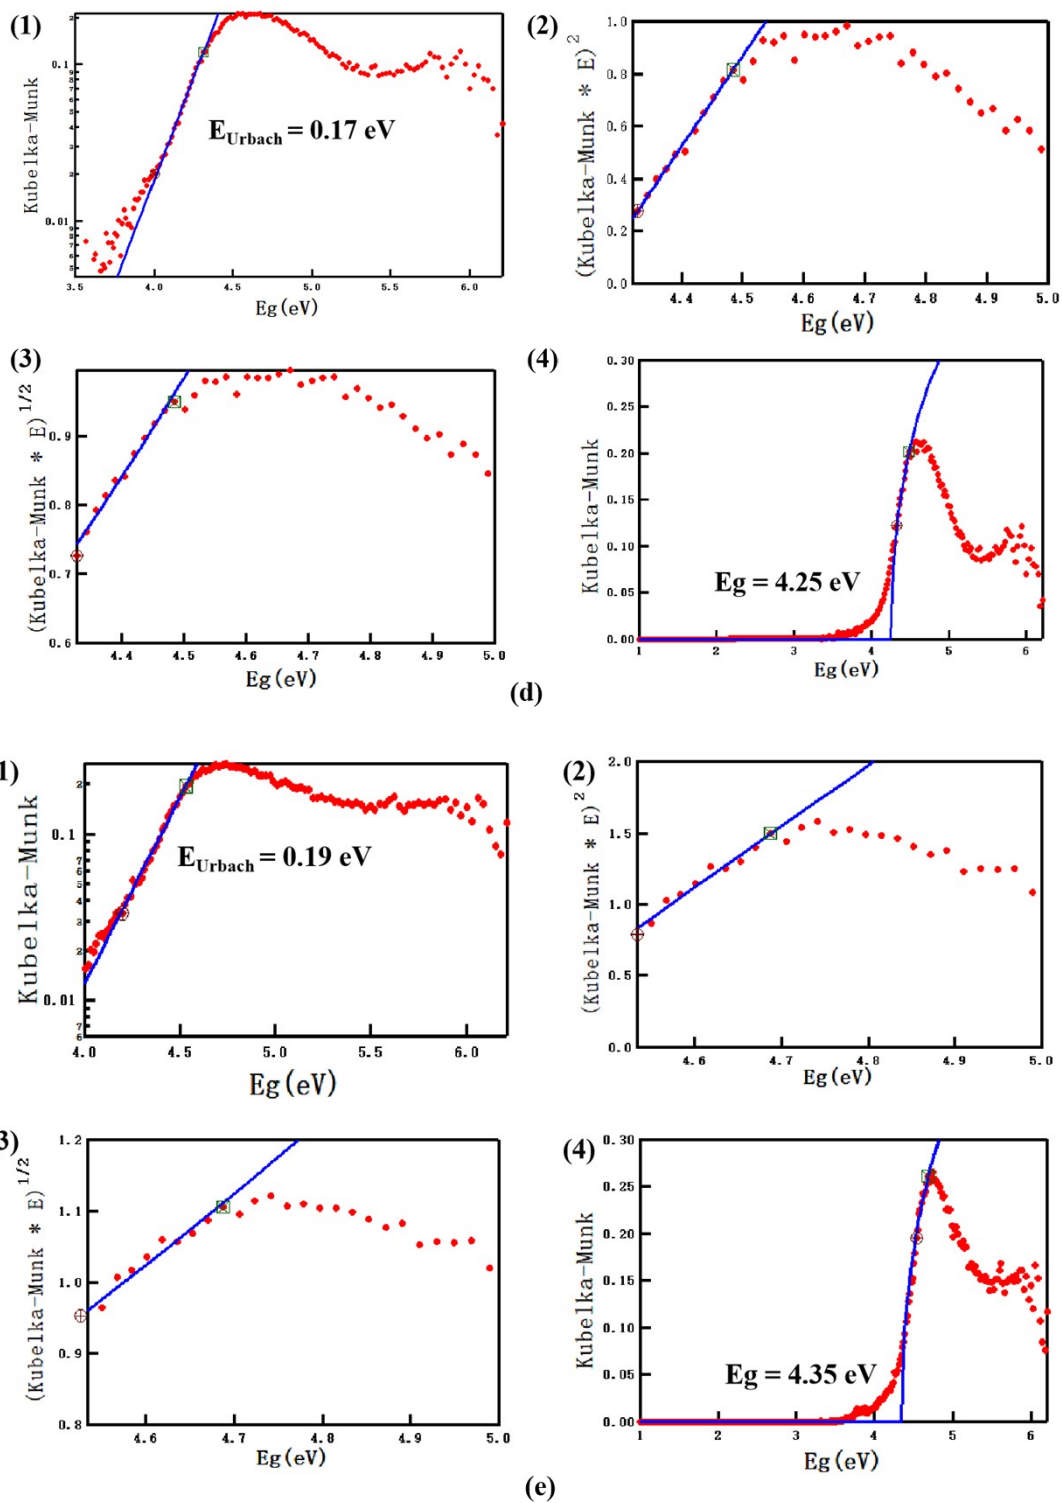

**Figure S10.** Semilogarithmic plot of the absorption spectrum (a1-e1). Band gap determination assuming direct (a2-e2) and indirect (a3-e3) transitions. Direct band gap fit for 1, 2, 3, 4, and 6 (a4-e4).



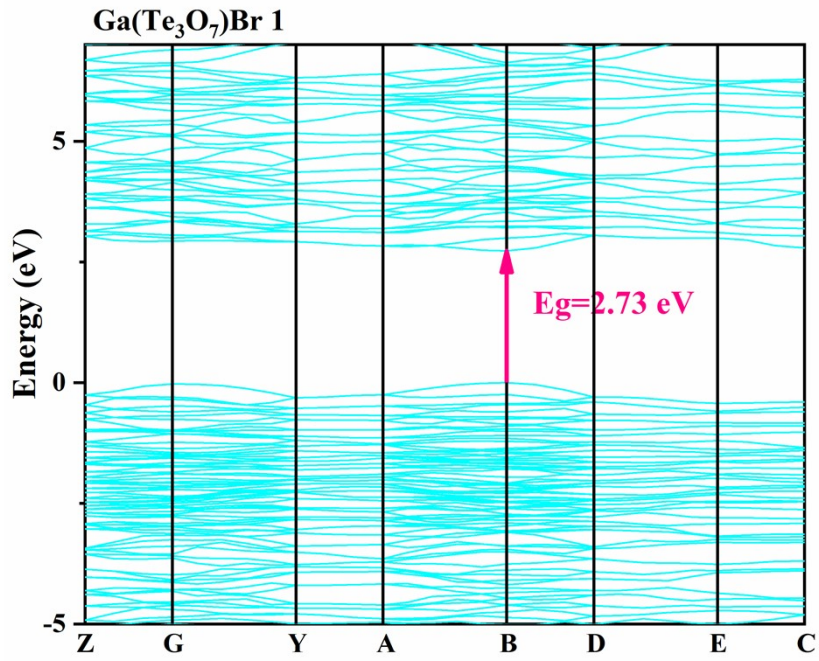

(a)

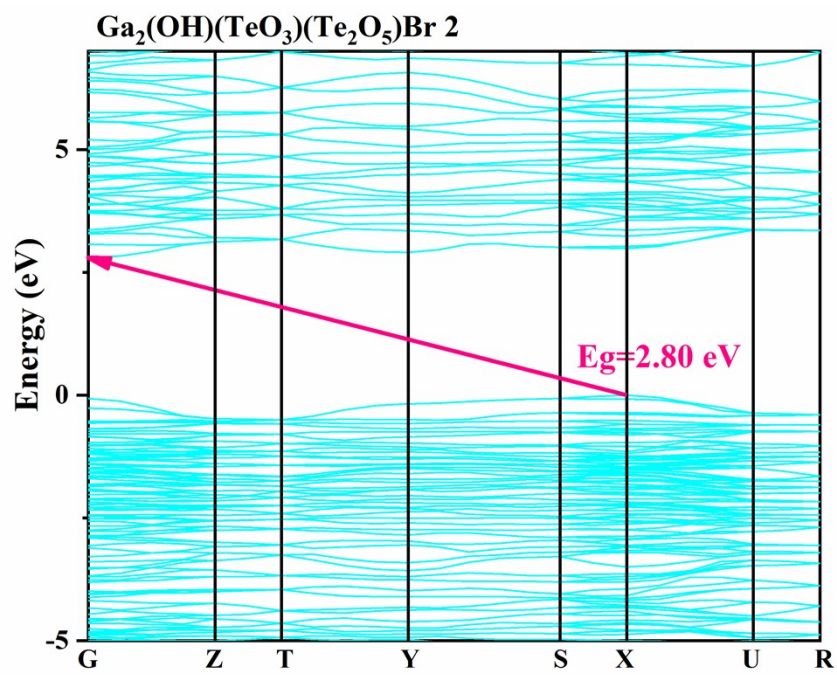

(b)

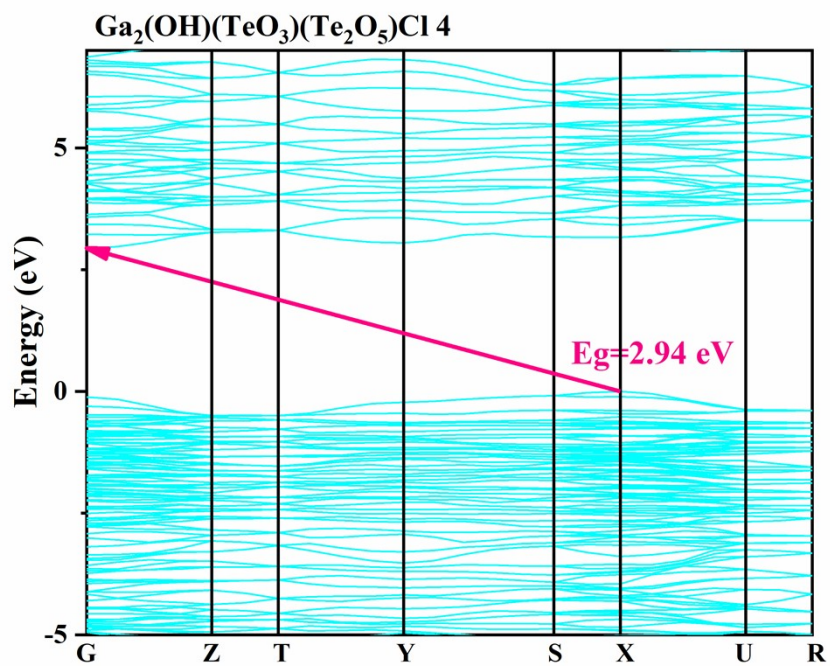

(c)

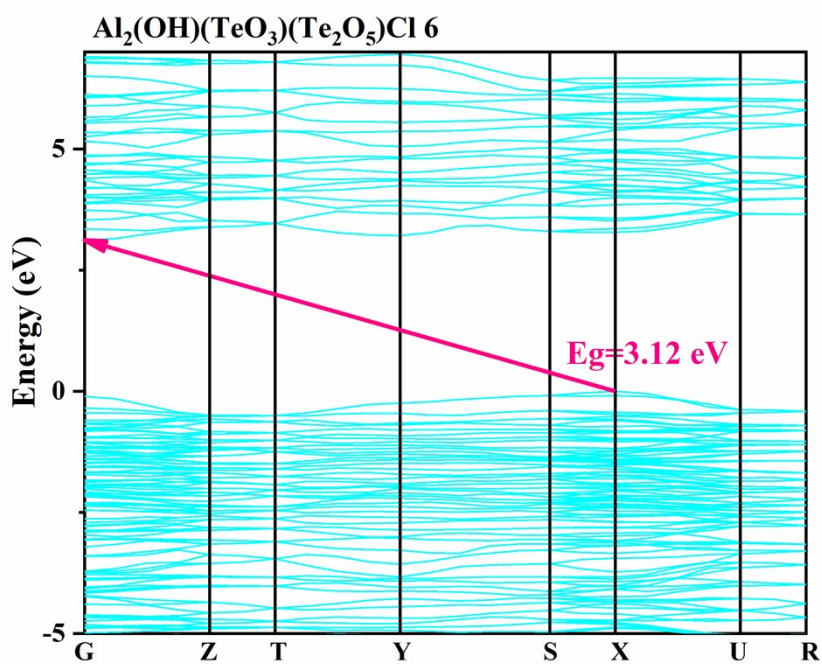

(d)

**Figure S11.** The band structures of **1** (a), **2** (b), **4** (c), and **6** (d).

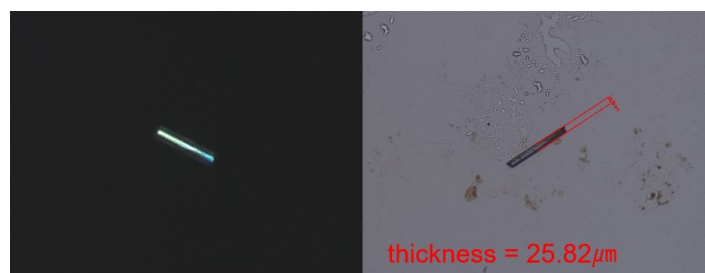

(a)

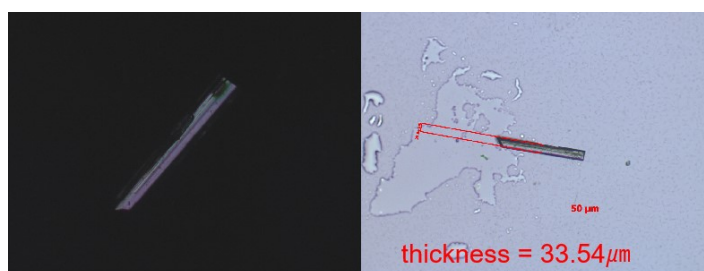

(b)

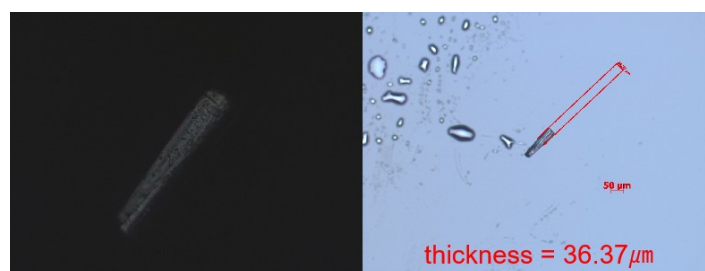

(c)

**Figure S12.** The experiment birefringence of **2** (a), **4** (b), and **6** (c).

## References

1. M. D. Segall, J. D. L. Philip, M. J. Probert, C. J. Pickard, P. J. Hasnip, S. J. Clark, M. C. Payne, *Phys-Condens Mat.* **2002**, *14*, 2717.
2. J. P. Perdew, K. Burke, M. Ernzerhof, *Phys. Rev. Lett.* **1996**, *77*, 3865-3868.
3. V. Milman, B. Winkler, J. A. White, C. J. Pickard, M. C. Payne, E. V. Akhmatkaya, R. H. Nobes, *Int. J. Quantum. Chem.* **2000**, *77*, 895-910.
4. C. Aversa, J. E. Sipe, *Phys. Rev. B: Condens. Matter Mater. Phys.* **1995**, *52*, 14636-14645.
5. S. N. Rashkeev, W. R. L. Lambrecht, B. Segall, *Phys. Rev. B: Condens. Matter Mater. Phys.* **1998**, *57*, 3905-3919.
6. J. Lin, M.-H. Lee, Z.-P. Liu, C. Chen, C. J. Pickard, *Phys. Rev. B: Condens. Matter Mater. Phys.* **1999**, *60*, 13380-13389.
7. M. Wen, C. Hu, Z. H. Yang, X. H. Wu, S. L. Pan, *Dalton Trans.* **2018**, *47*, 9453-9458.
8. M. Zhao, W. Dong, Y. Wu, D. Mei, S. Wen, T. Doert, *J. Alloys Compd.* **2021**, 865.
9. X. H. Dong, H. B. Huang, L. Huang, Y. Q. Zhou, B. B. Zhang, H. M. Zeng, Z. E. Lin, G. H. Zou, *Angew. Chem. Int. Ed.* **2024**, 63.
10. Y. P. Gong, Y. X. Ma, S. M. Ying, J. G. Mao, F. Kong, *Inorg. Chem.* **2019**, *58*, 11155-11163.
11. J. Y. Chung, S. Yeon, H. Ryu, T. S. You, J. I. Jang, K. M. Ok, *J. Alloys Compd.* **2022**, 895.
12. Y. G. Chen, N. Yang, X. N. Yao, C. B. Li, Y. Guo, X. M. Zhang, *Inorg. Chem.* **2018**, *57*, 5406-5412.
13. S. Lee, H. Jo, K. M. Ok, *J. Solid State Chem.* **2019**, *271*, 298-302.
14. Y. Q. Feng, H. T. Fan, Z. G. Zhong, H. W. Wang, D. F. Qiu, *Inorg. Chem.* **2016**, *55*, 11987-11992.
15. F. Kong, X. Xu, J. G. Mao, *Inorg. Chem.* **2010**, *49*, 11573-11580.
16. C. Bai, Y. Chu, J. Z. Zhou, L. A. Wang, L. Luo, S. L. Pan, J. J. Li, *Inorg. Chem. Front.* **2022**, *9*, 1023-1030.
17. S. D. Nguyen, S. H. Kim, P. S. Halasyamani, *Inorg. Chem.* **2011**, *50*, 5215-5222.
18. Q. Wu, J. Zhou, X. Liu, X. Jiang, Q. Zhang, Z. Lin, M. Xia, *Inorg. Chem.* **2021**, *60*, 18512-18520.
19. J. H. Feng, C. L. Hu, H. P. Xia, F. Kong, J. G. Mao, *Inorg. Chem.* **2017**, *56*, 14697-14705.
20. J. J. Zhou, H. P. Wu, H. W. Yu, S. T. Jiang, Z. G. Hu, J. Y. Wang, Y. C. Wu, P. S. Halasyamani, *J. Am. Chem. Soc.* **2020**, *142*, 4616-4620.
21. K. C. Chen, C. S. Lin, G. Peng, Y. Chen, H. Z. Huang, E. Z. Chen, Y. X. Min, T. Yan, M. Luo, N. Ye, *Chem. Mater.* **2022**, *34*, 399-404.
22. Q. Wang, X. H. Dong, L. Huang, K. M. Ok, Z. E. Lin, G. H. Zou, *Small* **2023**, *19*.
23. B. Stöger, M. Weil, *Z. Anorg. Allg. Chem.* **2012**, *638*, 2150-2157.
24. L. N. Kholodkovskaya, V. A. Dolgikh, B. A. Popovkin, *J. Solid State Chem.* **1995**, *116*, 406-408.
25. H. L. Jiang, J. G. Mao, *Inorg. Chem.* **2006**, *45*, 717-721.

26. S. Y. Zhang, C. L. Hu, P. X. Li, H. L. Jiang, J. G. Mao, *Dalton Trans.* **2012**, *41*, 9532-9542.
27. P. F. Li, C. L. Hu, B. X. Li, J. G. Mao, F. Kong, *Inorg. Chem. Front.* **2023**, *10*, 7343-7350.
